# Supplementary material for: Structure-guided unlocking of NaX reveals a non-selective tetrodotoxin-sensitive cation channel
Source: PubMed Central journal article supplement (PMC8931054; doi:10.1038/s41467-022-28984-4), 2022-03-17
Supplement: 41467_2022_28984_MOESM1_ESM.pdf [file 41467_2022_28984_MOESM1_ESM.pdf]

## SUPPLEMENTARY INFORMATION FOR:

### Structure-guided unlocking of Na<sub>x</sub> reveals a non-selective tetrodotoxin-sensitive cation channel

Cameron L. Noland<sup>1,#,&</sup>, Han Chow Chua<sup>2,#</sup>, Marc Kschonsak<sup>1,#</sup>, Stephanie Andrea Heusser<sup>2</sup>, Nina Braun<sup>2</sup>, Timothy Chang<sup>3</sup>, Christine Tam<sup>3</sup>, Jia Tang<sup>4</sup>, Christopher P. Arthur<sup>1</sup>, Claudio Ciferri<sup>1,\*</sup>, Stephan Alexander Pless<sup>2,\*</sup>, Jian Payandeh<sup>1,\*,%</sup>

<sup>1</sup>Department of Structural Biology, Genentech Inc., South San Francisco, CA, USA 94080

<sup>2</sup>Department of Drug Design and Pharmacology, University of Copenhagen, Copenhagen, Denmark, 10 DK 2100

<sup>3</sup>Department of BioMolecular Resources, Genentech Inc., South San Francisco, CA, USA 94080

<sup>4</sup>Department of Microchemistry, Proteomics & Lipidomics, Genentech Inc., South San Francisco, CA, USA 94080

#These authors contributed equally: C.L.N., H.C.C., M.K.

&Current address (C.L.N.): Department of Computational and Structural Chemistry, Merck Research Labs, South San Francisco, CA 94080

%Current address (J.P.): Department of Proteomics and Bioinformatics, Interline Therapeutics, South San Francisco, CA, USA, 94080

\*Corresponding authors: ciferri.claudio@gene.com, stephan.pless@sund.ku.dk, jpayandeh@interlinetx.com

|                                 |                                                                                                  |            |
|---------------------------------|--------------------------------------------------------------------------------------------------|------------|
| <b>Supplementary Figure 1.</b>  | Evaluation of human Na <sub>x</sub> in different expression systems.                             | page 2-3   |
| <b>Supplementary Figure 2.</b>  | Multiple-sequence alignment of Na <sub>x</sub> and Na <sub>v</sub> channels.                     | page 4-6   |
| <b>Supplementary Figure 3.</b>  | Na <sub>x</sub> channel sample purification.                                                     | page 7     |
| <b>Supplementary Figure 4.</b>  | Cryo-EM workflow for Na <sub>x</sub> -nanodisc sample.                                           | page 8     |
| <b>Supplementary Figure 5.</b>  | Overall Na <sub>x</sub> structure and comparison to Na <sub>v</sub> channels.                    | page 9     |
| <b>Supplementary Figure 6.</b>  | Cryo-EM workflow for Na <sub>x</sub> -GDN detergent sample.                                      | page 10    |
| <b>Supplementary Figure 7.</b>  | Na <sub>x</sub> DIII-DIV linker and Na <sub>v</sub> 1.7-Na <sub>x</sub> chimeric channels.       | page 11-12 |
| <b>Supplementary Figure 8.</b>  | Characterization of human Na <sub>x</sub> carrying targeted pore-wetting S6-mutations.           | page 13    |
| <b>Supplementary Figure 9.</b>  | Comparison of the Na <sub>x</sub> and Na <sub>v</sub> 1.7 selectivity filters.                   | page 14    |
| <b>Supplementary Figure 10.</b> | Human Na <sub>x</sub> has atypical voltage sensor-like domains but a common hydrophobic S6 gate. | page 15    |
| <b>Supplementary Table 1.</b>   | Cryo-EM data collection, refinement and validation statistics                                    | page 16    |

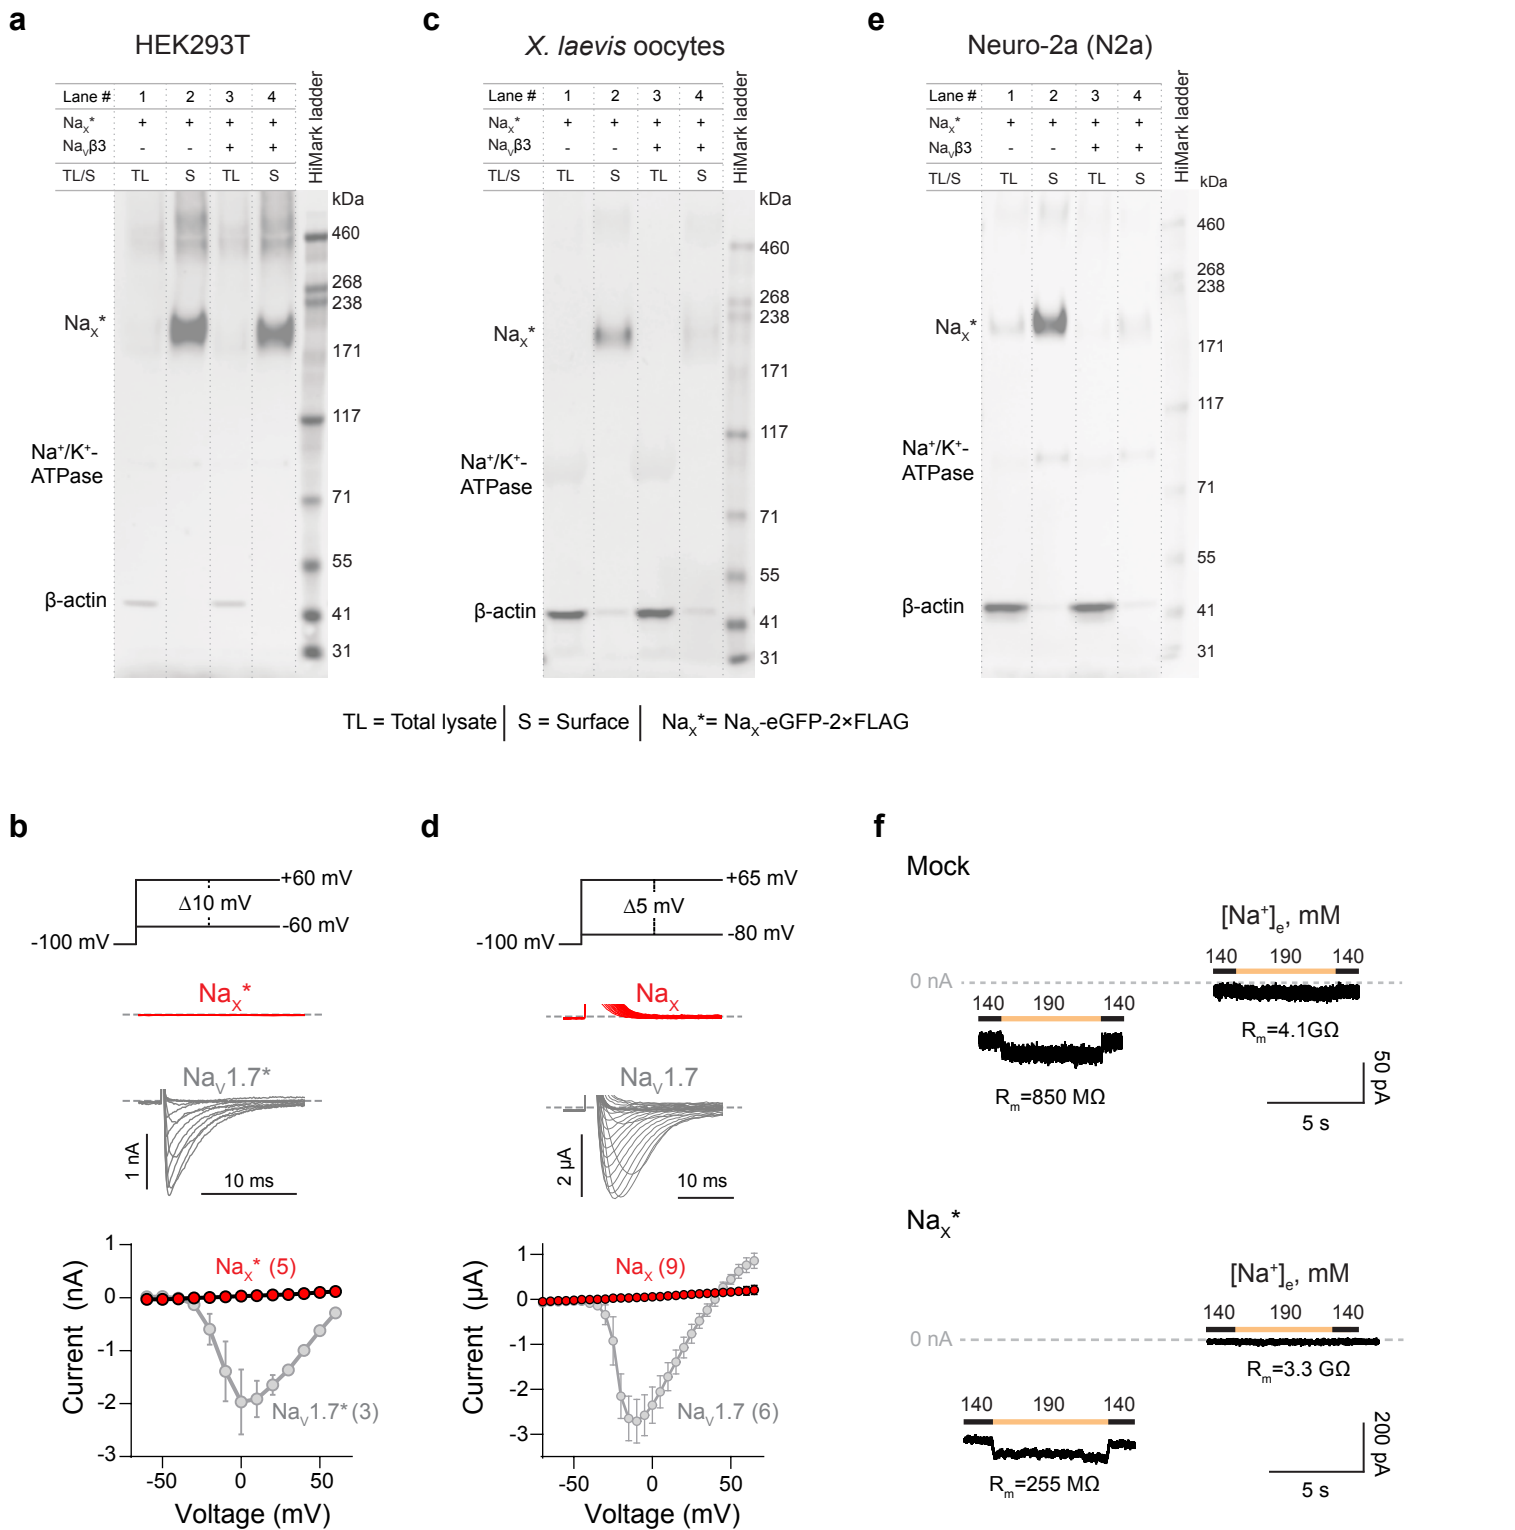

### Supplementary Figure 1. Evaluation of human Na<sub>x</sub> in different expression systems.

- a.** Western blots of total lysate and surface fraction of proteins extracted from HEK293T cells expressing the indicated constructs with C-terminal GFP and Flag tags on Na<sub>x</sub>. Data represent three independent biological replicates.
- b.** Representative currents from HEK293T cells expressing human Na<sub>x</sub> or Na<sub>v</sub>1.7 (with C-terminal GFP and Flag tags) with indicated voltage protocol. Data are shown as mean ± SD. Numbers of biological replicates (*n*) are indicated.
- c.** Western blots of total lysate and surface fraction of proteins extracted from *Xenopus laevis* oocytes expressing the indicated constructs with C-terminal GFP and Flag tags on Na<sub>x</sub>. Data represent three independent biological replicates.
- d.** Representative currents from oocytes expressing untagged human Na<sub>x</sub> or Na<sub>v</sub>1.7 with indicated voltage protocol. Data are shown as mean ± SD. Numbers of biological replicates (*n*) are indicated.
- e.** Western blots of total lysate and surface fraction of proteins extracted from murine Neuro-2A cells expressing the indicated constructs with C-terminal GFP and Flag tags on Na<sub>x</sub>. Data represent three independent biological replicates.
- f.** Representative currents from Neuro-2A cells expressing human Na<sub>x</sub> (with C-terminal GFP and Flag tags) under indicated extracellular Na<sup>+</sup> concentrations (HP=-60 mV). Seal resistances (*R<sub>m</sub>*) of individual cells are provided.

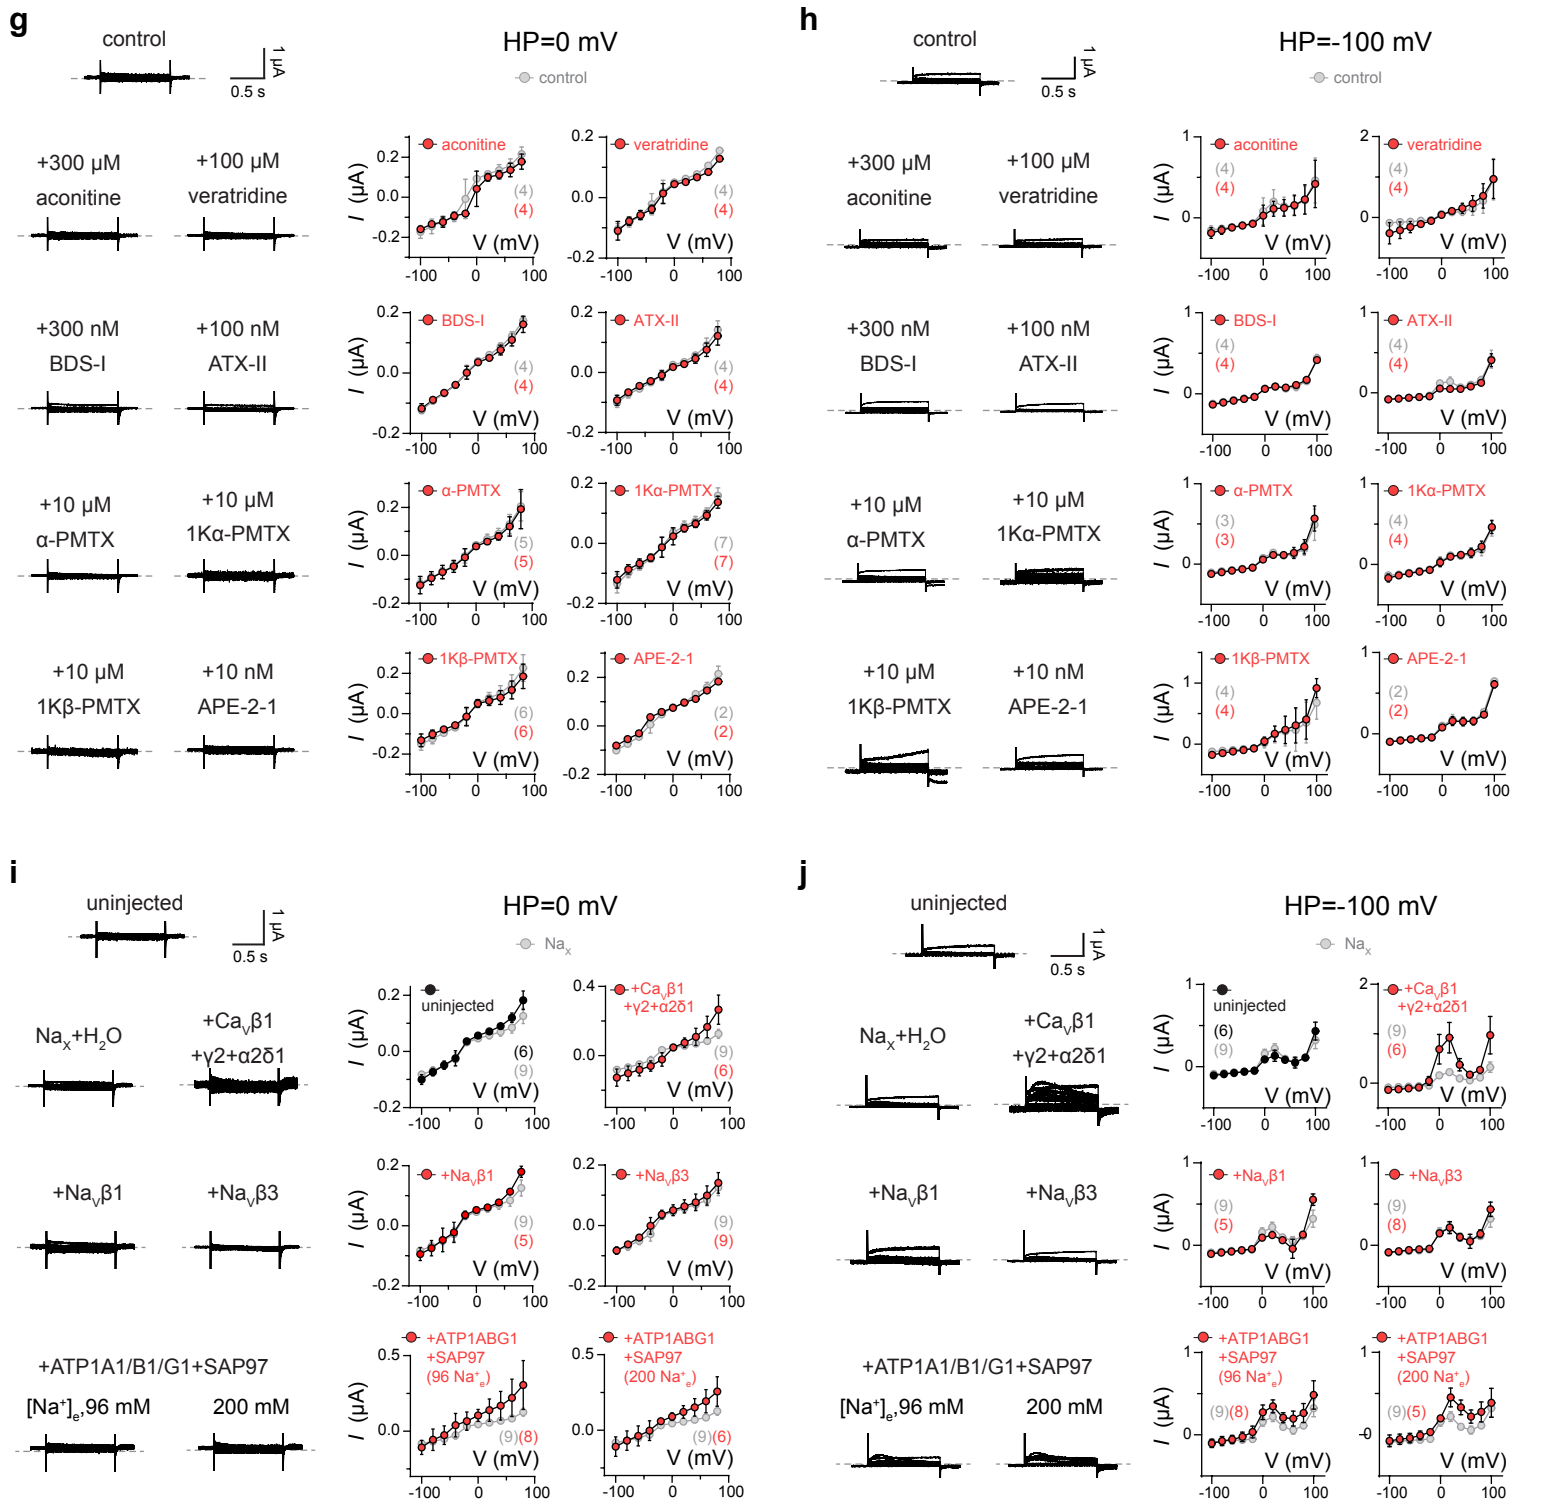

### Supplementary Figure 1 (continued).

**g-h.** Representative currents from oocytes expressing  $\text{Na}_x$  in response to extracellular application of indicated compounds using two different voltage-step protocols (BDS-I: Blood depressing substance I; ATX-II: Neurotoxin 2;  $\alpha$ -PMTX:  $\alpha$ -Pompilidotoxin; 1K $\alpha$ -PMTX: 1K $\alpha$ -Pompilidotoxin; 1K $\beta$ -PMTX: 1K $\beta$ -Pompilidotoxin; APE-2-1: Anthopleurin-C). **g**, steps between +80 to -100 mV, in 20 mV increments, from a HP of 0 mV; **h**, steps between -100 to +100 mV, in 20 mV increments, from a HP of -100 mV. Right, shows I-V curve data summary from two independent experiments. Data are shown as mean  $\pm$  SD. Numbers of biological replicates ( $n$ ) are indicated.

**i-j.** Representative currents from oocytes co-expressing  $\text{Na}_x$  with  $\text{Na}_v$  and  $\text{Ca}_v$  auxiliary subunits,  $\text{Na}^+/\text{K}^+$ -ATPase  $\alpha$  and  $\beta$  subunits, or synapse-associated protein 97 (SAP97) in response to two different voltage-step protocols. **i**, steps between +80 to -100 mV, in 20 mV increments, from a HP of 0 mV; **j**, steps between -100 to +100 mV, in 20 mV increments, from a HP of -100 mV. Right, shows I-V curve data summary from two independent experiments. Data are shown as mean  $\pm$  SD. Numbers of biological replicates ( $n$ ) are indicated.

NTD  
1 10 20 30 40 50 60 70 80 90  
hNax .....MLASPEPKGLVPTKESFELKQHIAKTH.....NEDH.FEEDLKPDPDEVGKKLPYGNLSOGMVSEPLEDVPYKKNFENRRTIFVYS  
mNax .....MLTSPEPKGLVPTKESFELKQHIAKTH.....NEDH.FEEDLKPDPDEVGKKLPYGNLSOGMVSEPLEDVPYKKNFENRRTIFVYS  
Nav1.1 ...MEQTVLVVPPGDSFNFFRESLAAERRIAEKAKNPKKDD...KK.DDDENGPKPSSSD.FAGKRLPELTYGNLPRGTVSEPLEDVPYKKNFENRRTIFVYS  
Nav1.2 ...MAQSVLVPPGDSFNFFRESLAAERRIAEKAKNPKKDD...KK.DDDENGPKPSSSD.FAGKRLPELTYGNLPRGTVSEPLEDVPYKKNFENRRTIFVYS  
Nav1.3 ...MAQALLVPPGDSFNFFRESLAAERRIAEKAKNPKKDD...O.DNDDENGPKPSSSD.FAGKRLPELTYGNLPRGTVSEPLEDVPYKKNFENRRTIFVYS  
Nav1.4 MARPSLCTLVPPGDSFNFFRESLAAERRAVAEARLRQNK...QMEI.FEPEPKPSSSD.FAGKRLPELTYGNLPRGTVSEPLEDVPYKKNFENRRTIFVYS  
Nav1.5 ...MANFLVPPGDSFNFFRESLAAERRIAEKAKNPKKDD...KK.DDDENGPKPSSSD.FAGKRLPELTYGNLPRGTVSEPLEDVPYKKNFENRRTIFVYS  
Nav1.6 ...MAARLVPPGDSFNFFRESLAAERRIAEKAKNPKKDD...KK.DDDENGPKPSSSD.FAGKRLPELTYGNLPRGTVSEPLEDVPYKKNFENRRTIFVYS  
Nav1.7 ...MAMLVPPGDSFNFFRESLAAERRIAEKAKNPKKDD...KK.DDDENGPKPSSSD.FAGKRLPELTYGNLPRGTVSEPLEDVPYKKNFENRRTIFVYS  
Nav1.8 ...MEFPTGSLPELNFRFRESLAAERRIAEKAKNPKKDD...KK.DDDENGPKPSSSD.FAGKRLPELTYGNLPRGTVSEPLEDVPYKKNFENRRTIFVYS  
Nav1.9 .MDDRCYVPVIFEDERFRFRESLAAERRIAEKAKNPKKDD...QTCGEVPPKPLD.FAGKRLPELTYGNLPRGTVSEPLEDVPYKKNFENRRTIFVYS

S1N S1 S2 S3 S4  
100 110 120 130 140 150 160 170 180 190 200  
hNax ILLCTLSPPNCIRRTTIKLVLPFFOLFSLVLDICVFLSLTNP...KWRPVEVETLLGYPPELVVARGWAGSFFDNNWLDSTVFEVIIRYSPLDFIPTL  
mNax IFCTLSPPLNLSLRAAIKALVPLFRLLLLSVLDSDSLMCMNSNLP...EWLALNTLLGYPPELVVARGWAGSFFDNNWLDSTVFEVIIRYSPLDFIPTL  
Nav1.1 ALYLTPPLNLSLRAAIKALVPLFRLLLLSVLDSDSLMCMNSNLP...DWTKNVYETPTGYPPELVVARGWAGSFFDNNWLDSTVFEVIIRYSPLDFIPTL  
Nav1.2 ALYLTPPLNLSLRAAIKALVPLFRLLLLSVLDSDSLMCMNSNLP...DWTKNVYETPTGYPPELVVARGWAGSFFDNNWLDSTVFEVIIRYSPLDFIPTL  
Nav1.3 ALYLTPPLNLSLRAAIKALVPLFRLLLLSVLDSDSLMCMNSNLP...DWTKNVYETPTGYPPELVVARGWAGSFFDNNWLDSTVFEVIIRYSPLDFIPTL  
Nav1.4 ALYLTPPLNLSLRAAIKALVPLFRLLLLSVLDSDSLMCMNSNLP...DWTKNVYETPTGYPPELVVARGWAGSFFDNNWLDSTVFEVIIRYSPLDFIPTL  
Nav1.5 ALYLTPPLNLSLRAAIKALVPLFRLLLLSVLDSDSLMCMNSNLP...DWTKNVYETPTGYPPELVVARGWAGSFFDNNWLDSTVFEVIIRYSPLDFIPTL  
Nav1.6 ALYLTPPLNLSLRAAIKALVPLFRLLLLSVLDSDSLMCMNSNLP...DWTKNVYETPTGYPPELVVARGWAGSFFDNNWLDSTVFEVIIRYSPLDFIPTL  
Nav1.7 ALYLTPPLNLSLRAAIKALVPLFRLLLLSVLDSDSLMCMNSNLP...DWTKNVYETPTGYPPELVVARGWAGSFFDNNWLDSTVFEVIIRYSPLDFIPTL  
Nav1.8 ALWLFSPPMLLRRTAIRVSVSWFSLFIVVILVNCVCSLTPDLP...LKEVYVPTGYPPELVVARGWAGSFFDNNWLDSTVFEVIIRYSPLDFIPTL  
Nav1.9 ALFIFGPFNSIRSLAIRVSVSWFSLFIVVILVNCVCSLTPDLP...LKEVYVPTGYPPELVVARGWAGSFFDNNWLDSTVFEVIIRYSPLDFIPTL

S4 S4-S5 S5  
210 220 230 240 250 260 270 280  
hNax QHAFRLRI LKIIPLNQI KSLVCHCLQIICVITLFLPSISLIMGLFPMYKHKCFRWPQENENETLHNR...RWBPENENETLHNR...  
mNax KPIIFRRLI LKIIPLNQI KSLVCHCLQIICVITLFLPSISLIMGLFPMYKHKCFRWPENENETLHNR...RWBPENENETLHNR...  
Nav1.1 RFFVFLRALKTISVIPGKTYGALLOSVKLSDVMI DVVITISVFAALIGQLFPAKRNKCLDWPPPNASLEESHSIEKNITVNYNG...TLIN  
Nav1.2 RFFVFLRALKTISVIPGKTYGALLOSVKLSDVMI DVVITISVFAALIGQLFPAKRNKCLDWPPPNASLEESHSIEKNITVNYNG...TLIN  
Nav1.3 RFFVFLRALKTISVIPGKTYGALLOSVKLSDVMI DVVITISVFAALIGQLFPAKRNKCLDWPPPNASLEESHSIEKNITVNYNG...TLIN  
Nav1.4 RFFVFLRALKTISVIPGKTYGALLOSVKLSDVMI DVVITISVFAALIGQLFPAKRNKCLDWPPPNASLEESHSIEKNITVNYNG...TLIN  
Nav1.5 RFFVFLRALKTISVIPGKTYGALLOSVKLSDVMI DVVITISVFAALIGQLFPAKRNKCLDWPPPNASLEESHSIEKNITVNYNG...TLIN  
Nav1.6 RFFVFLRALKTISVIPGKTYGALLOSVKLSDVMI DVVITISVFAALIGQLFPAKRNKCLDWPPPNASLEESHSIEKNITVNYNG...TLIN  
Nav1.7 RFFVFLRALKTISVIPGKTYGALLOSVKLSDVMI DVVITISVFAALIGQLFPAKRNKCLDWPPPNASLEESHSIEKNITVNYNG...TLIN  
Nav1.8 RFFVFLRALKTISVIPGKTYGALLOSVKLSDVMI DVVITISVFAALIGQLFPAKRNKCLDWPPPNASLEESHSIEKNITVNYNG...TLIN  
Nav1.9 RFFVFLRALKTISVIPGKTYGALLOSVKLSDVMI DVVITISVFAALIGQLFPAKRNKCLDWPPPNASLEESHSIEKNITVNYNG...TLIN

P1 P2 S6  
290 300 310 320 330 340 350 360 370 380 390  
hNax ....TGPNVYIRETENFYVLEGERYALLCNRDAGOPEGVCKVAGIIPDOGFNFPSSSLLFLALRLMDDDPVPSVHDHLYASVYMIFFVVSFASVASTG  
mNax ....TGSLVYSPERINFYVMEGAKYALLCNRDAGOPEGVCKVAGIIPDOGFNFPSSSLLFLALRLMDDDPVPSVHDHLYASVYMIFFVVSFASVASTG  
Nav1.1 ETVFDFDKSVYIQDSRYHYFLLEGFLDALLCNRSDAGOPEGVCKVAGIIPDOGFNFPSSSLLFLALRLMDDDPVPSVHDHLYASVYMIFFVVSFASVASTG  
Nav1.2 RTVSIFNWDVYIDGDSHYFLLEGFLDALLCNRSDAGOPEGVCKVAGIIPDOGFNFPSSSLLFLALRLMDDDPVPSVHDHLYASVYMIFFVVSFASVASTG  
Nav1.3 VTMSTFNWVDYICDSDHYFLLDGQKDLLCNRSDAGOPEGVCKVAGIIPDOGFNFPSSSLLFLALRLMDDDPVPSVHDHLYASVYMIFFVVSFASVASTG  
Nav1.4 ATNDTDFWDVYISDEGNYFLLEGSDALLCNRSDAGOPEGVCKVAGIIPDOGFNFPSSSLLFLALRLMDDDPVPSVHDHLYASVYMIFFVVSFASVASTG  
Nav1.5 .LVWESLDLVLSDPENYLLKNGTSDVLLCNRSDAGOPEGVCKVAGIIPDOGFNFPSSSLLFLALRLMDDDPVPSVHDHLYASVYMIFFVVSFASVASTG  
Nav1.6 NGTKGFWDVYIENKNTFYVFPGLMLLPCNRSDAGOPEGVCKVAGIIPDOGFNFPSSSLLFLALRLMDDDPVPSVHDHLYASVYMIFFVVSFASVASTG  
Nav1.7 T....LESIEDFRKVFYVLEGSDKALLCNRSDAGOPEGVCKVAGIIPDOGFNFPSSSLLFLALRLMDDDPVPSVHDHLYASVYMIFFVVSFASVASTG  
Nav1.8 ....SRRKPDYINKRGTSDVLLCNRSDAGOPEGVCKVAGIIPDOGFNFPSSSLLFLALRLMDDDPVPSVHDHLYASVYMIFFVVSFASVASTG  
Nav1.9 ....DHCFEKENSPEFKMGLIMGNSAISIOPCKHTKIIPDOGFNFPSSSLLFLALRLMDDDPVPSVHDHLYASVYMIFFVVSFASVASTG

S6  
400 410 420 430  
hNax ILLAMAEKQKRVGEISKKIEPKFOQTGKLEQECNETDAK...TQIEM.KKRSPITDTSLDVLEDAFL...RHKE...PKSKK...PLYWYKPAKT  
mNax ILLAMAEKQKRVGEISKKIEPKFOQTGKLEQECNETDAK...TQIEM.KKRSPITDTSLDVLEDAFL...RHKE...PKSKK...PLYWYKPAKT  
Nav1.1 VVA...AEQNOATLEEAEQKPAEFQOMLEQLKKQDEEAQAAATAATASE.HS...REPSAAGRLSDSSSEASKLSKSKAKERRNRRKKRQKQESGEEKD.EDEFQKSESED  
Nav1.2 VVA...AEQNOATLEEAEQKPAEFQOMLEQLKKQDEEAQAAATAATASE.HS...REPSAAGRLSDSSSEASKLSKSKAKERRNRRKKRQKQESGEEKD.EDEFQKSESED  
Nav1.3 VVA...AEQNOATLEEAEQKPAEFQOMLEQLKKQDEEAQAAATAATASE.HS...REPSAAGRLSDSSSEASKLSKSKAKERRNRRKKRQKQESGEEKD.EDEFQKSESED  
Nav1.4 VVA...AEQNOATLEEAEQKPAEFQOMLEQLKKQDEEAQAAATAATASE.HS...REPSAAGRLSDSSSEASKLSKSKAKERRNRRKKRQKQESGEEKD.EDEFQKSESED  
Nav1.5 VVA...AEQNOATLEEAEQKPAEFQOMLEQLKKQDEEAQAAATAATASE.HS...REPSAAGRLSDSSSEASKLSKSKAKERRNRRKKRQKQESGEEKD.EDEFQKSESED  
Nav1.6 VVA...AEQNOATLEEAEQKPAEFQOMLEQLKKQDEEAQAAATAATASE.HS...REPSAAGRLSDSSSEASKLSKSKAKERRNRRKKRQKQESGEEKD.EDEFQKSESED  
Nav1.7 VVA...AEQNOATLEEAEQKPAEFQOMLEQLKKQDEEAQAAATAATASE.HS...REPSAAGRLSDSSSEASKLSKSKAKERRNRRKKRQKQESGEEKD.EDEFQKSESED  
Nav1.8 VVT...AEQNOATLEEAEQKPAEFQOMLEQLKKQDEEAQAAATAATASE.HS...REPSAAGRLSDSSSEASKLSKSKAKERRNRRKKRQKQESGEEKD.EDEFQKSESED  
Nav1.9 VVT...AEQNOATLEEAEQKPAEFQOMLEQLKKQDEEAQAAATAATASE.HS...REPSAAGRLSDSSSEASKLSKSKAKERRNRRKKRQKQESGEEKD.EDEFQKSESED

hNax .....TQIEM.KKRSPITDTSLDVLEDAFL...RHKE...PKSKK...PLYWYKPAKT  
mNax .....TQIEM.KKRSPITDTSLDVLEDAFL...RHKE...PKSKK...PLYWYKPAKT  
Nav1.1 SIRRKGFRRFIEGNRLTYEKRYSSPHQSLLSIRGSLFSPRRNSRSTSLFSFRGR.AKDVGSENDFADDEHSTFEDNESRRDLSLFPVRRHGERRNS...NLSQTSRSSRMLAV  
Nav1.2 SIRRKGFRRFIEGNRLTYEKRYSSPHQSLLSIRGSLFSPRRNSRSTSLFSFRGR.AKDVGSENDFADDEHSTFEDNESRRDLSLFPVRRHGERRNS...NLSQTSRSSRMLAV  
Nav1.3 SVKRSSFLFSMDGNRLTSDDKFCSPHQSLLSIRGSLFSPRRNSRSTSLFSFRGR.AKDVGSENDFADDEHSTFEDNESRRDLSLFPVRRHGERRNS...NLSQTSRSSRMLAV  
Nav1.4 .....TQIEM.KKRSPITDTSLDVLEDAFL...RHKE...PKSKK...PLYWYKPAKT  
Nav1.5 GPRAMNHLSLTRG...LSRST...SMKPRSSRGSITFTR...RRDLGSEADFADDEHSTFEDNESRRDLSLFPVRRHGERRNS...NLSQTSRSSRMLAV  
Nav1.6 GMRKAPFLPDNR...IGRKFISIMNQLSIPGSPFLSRHNSKSSIFSPRPGFRDQSGSENEFADDEHSTFEDNESRRDLSLFPVRRHGERRNS...NLSQTSRSSRMLAV  
Nav1.7 SIRRKSFHLLGVEGHRAHEKRLSTPNQSPSIRGSLFSPRRNSRSTSLFSFRGR.GRDIGSETFADDEHSTFEDNESRRDLSLFPVRRHGERRNS...NLSQTSRSSRMLAV  
Nav1.8 .....TQIEM.KKRSPITDTSLDVLEDAFL...RHKE...PKSKK...PLYWYKPAKT  
Nav1.9 .....TQIEM.KKRSPITDTSLDVLEDAFL...RHKE...PKSKK...PLYWYKPAKT

440 450 460 470 480  
hNax .....TQIEM.KKRSPITDTSLDVLEDAFL...RHKE...PKSKK...PLYWYKPAKT  
mNax .....TQIEM.KKRSPITDTSLDVLEDAFL...RHKE...PKSKK...PLYWYKPAKT  
Nav1.1 FPANGKMHSTVDCNCGVSVLVGCGP.VSPTSPVQQLLPEVIIDKATDDNGTTFETEM.KKRSPITDTSLDVLEDAFL...RHKE...PKSKK...PLYWYKPAKT  
Nav1.2 LPMNGKMHSAVDCNCGVSVLVGCGP.SLTS.AGQLLPE...GTTTETETI.RKRSSSYHVMEMDLEDPSSRQRAMSASILTNT.MEELSSRQ.PCWYRFANMVC  
Nav1.3 LPANGKMHSTVDCNCGVSVLVGCGP.SALTSPTGQLPE...GTTTETETI.RKRSSSYHVMEMDLEDPSSRQRAMSASILTNT.MEELSSRQ.PCWYRFANMVC  
Nav1.4 .....GKDCNCGSLLDSQGE.KG...APRQ...SSBGSLSIDAMEELSAHQ.PCWYRFANMVC  
Nav1.5 HALHGKKNSTVDCNCGVSVLVGCGP.SGSHL.LRPMLEHPPDDTT.TPSEEPG.GPOMLTQOAPVVDGPEEPGARQALSAVSVLRTSA.LEELSSRQ.PCWYRFANMVC  
Nav1.6 LRRSVKRNSTVDCNCGVSVLVGCGP.GSHI.LGRRLLPE...ATTETETI.RKRSSSYHVMEMDLEDPSSRQRAMSASILTNT.MEELSSRQ.PCWYRFANMVC  
Nav1.7 LRVNGKMHSAVDCNCGVSVLVGCGP.SALMLPQQLLPEVIIDKATSDSDSGTNOI.H.KKRCSYLLSEEDMLPNLRQRAMSASILTNT.MEELSSRQ.PCWYRFANMVC  
Nav1.8 NPD...SRHGEDEHQPPPTSELAPGA...VDSVA.FDAGQKFFLSAEVLDPEPRAQRAMSASILTNT.MEELSSRQ.PCWYRFANMVC  
Nav1.9 .....EDCOKKP...QLLEQTKLSONLSLDHFDEHDPQRQRALSASVILTTI.MKSDLSQEP.PCGENILASKY

Diagram showing domain S1N, S1, S2, S3, and S4. Sequence alignment for hNax, mNax, and Nav1.1-9. Residues 490-590 are shown. Conserved residues are highlighted in black. Asterisks mark specific residues in the Nav1.9 sequence.

Diagram showing domain S4, S4-S5, S5, P1, and P2. Sequence alignment for hNax, mNax, and Nav1.1-9. Residues 600-700 are shown. Conserved residues are highlighted in black. Asterisks mark specific residues in the Nav1.9 sequence.

Diagram showing domain S6. Sequence alignment for hNax, mNax, and Nav1.1-9. Residues 710-790 are shown. Conserved residues are highlighted in black.

Sequence alignment for hNax, mNax, and Nav1.1-9. Residues 800-860 are shown. Conserved residues are highlighted in black.

Diagram showing domain S1N and S1. Sequence alignment for hNax, mNax, and Nav1.1-9. Residues 870-950 are shown. Conserved residues are highlighted in black.

Diagram showing domain S1, S2, S3, S4, S4-S5, and S5. Sequence alignment for hNax, mNax, and Nav1.1-9. Residues 960-1060 are shown. Conserved residues are highlighted in black. Asterisks mark specific residues in the Nav1.9 sequence.

Diagram showing domain S5, P1, P2, and S6. Sequence alignment for hNax, mNax, and Nav1.1-9. Residues 1070-1170 are shown. Conserved residues are highlighted in black. Asterisks mark specific residues in the Nav1.9 sequence.



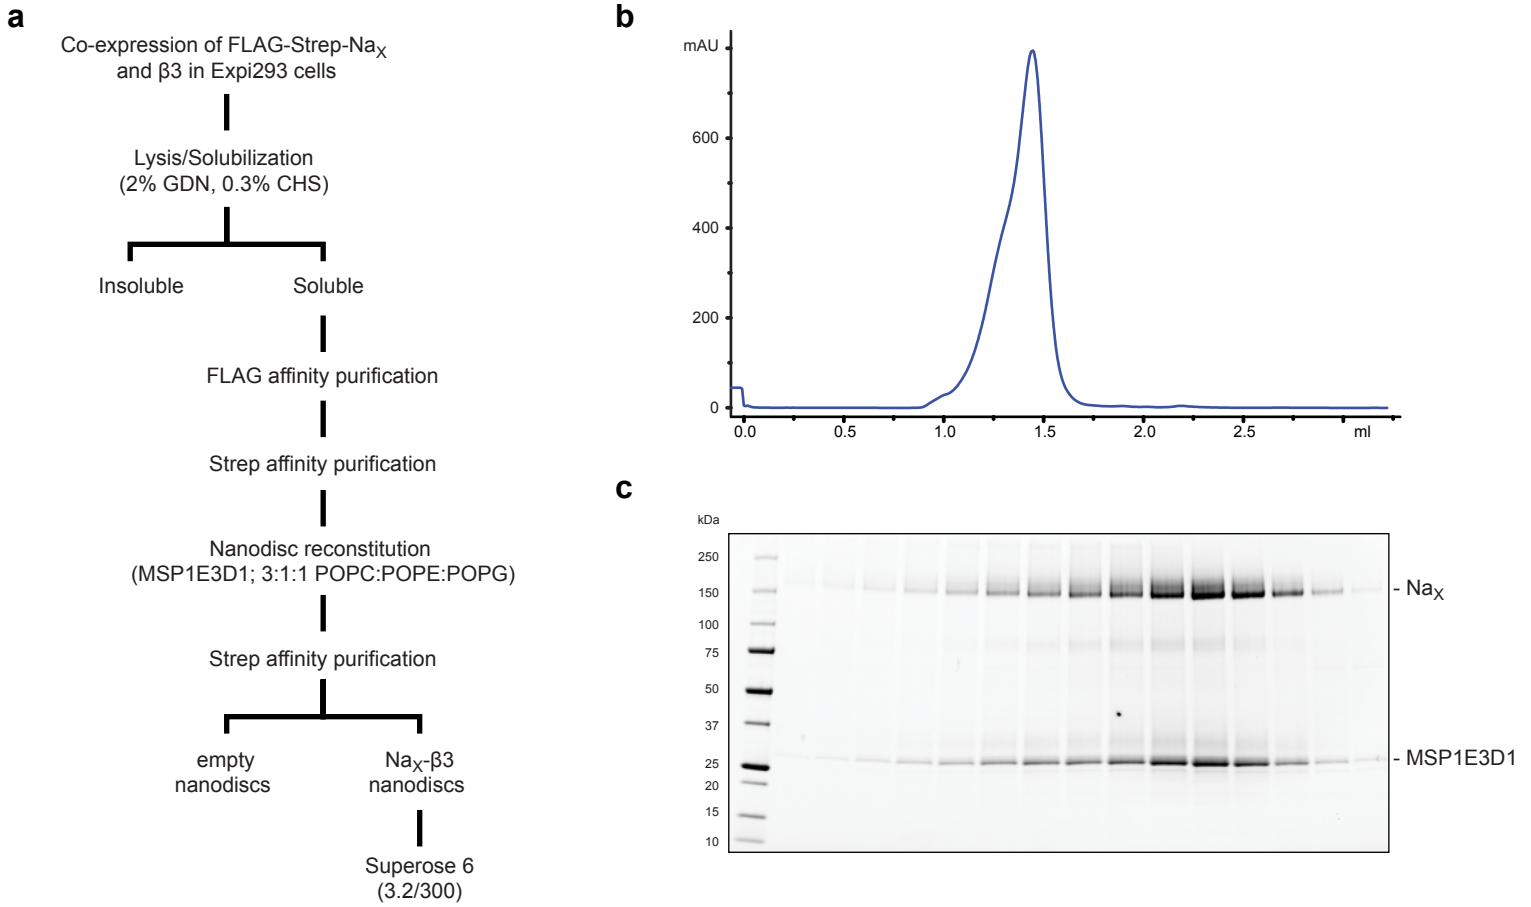

**Supplementary Figure 3.  $\text{Na}_x$  channel sample purification.**

**a.**  $\text{Na}_x$  expression, purification and reconstitution scheme.

**b.** Size-exclusion chromatography elution profile for  $\beta 3$ - $\text{Na}_x$  sample in lipid nanodiscs (MSP1E3D1).

**c.** SDS-PAGE analysis of size exclusion chromatography elution fractions.

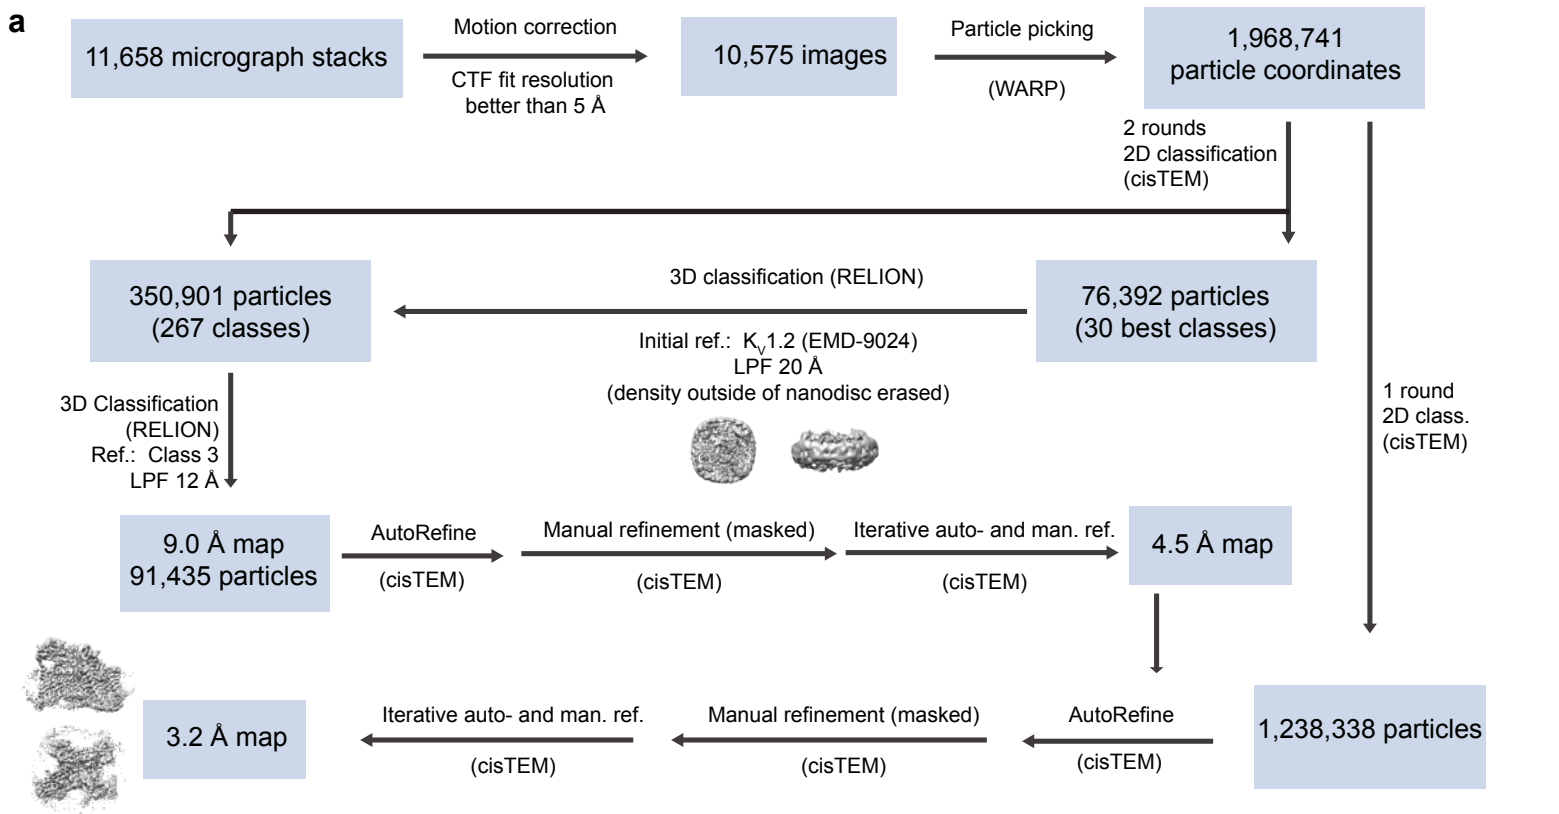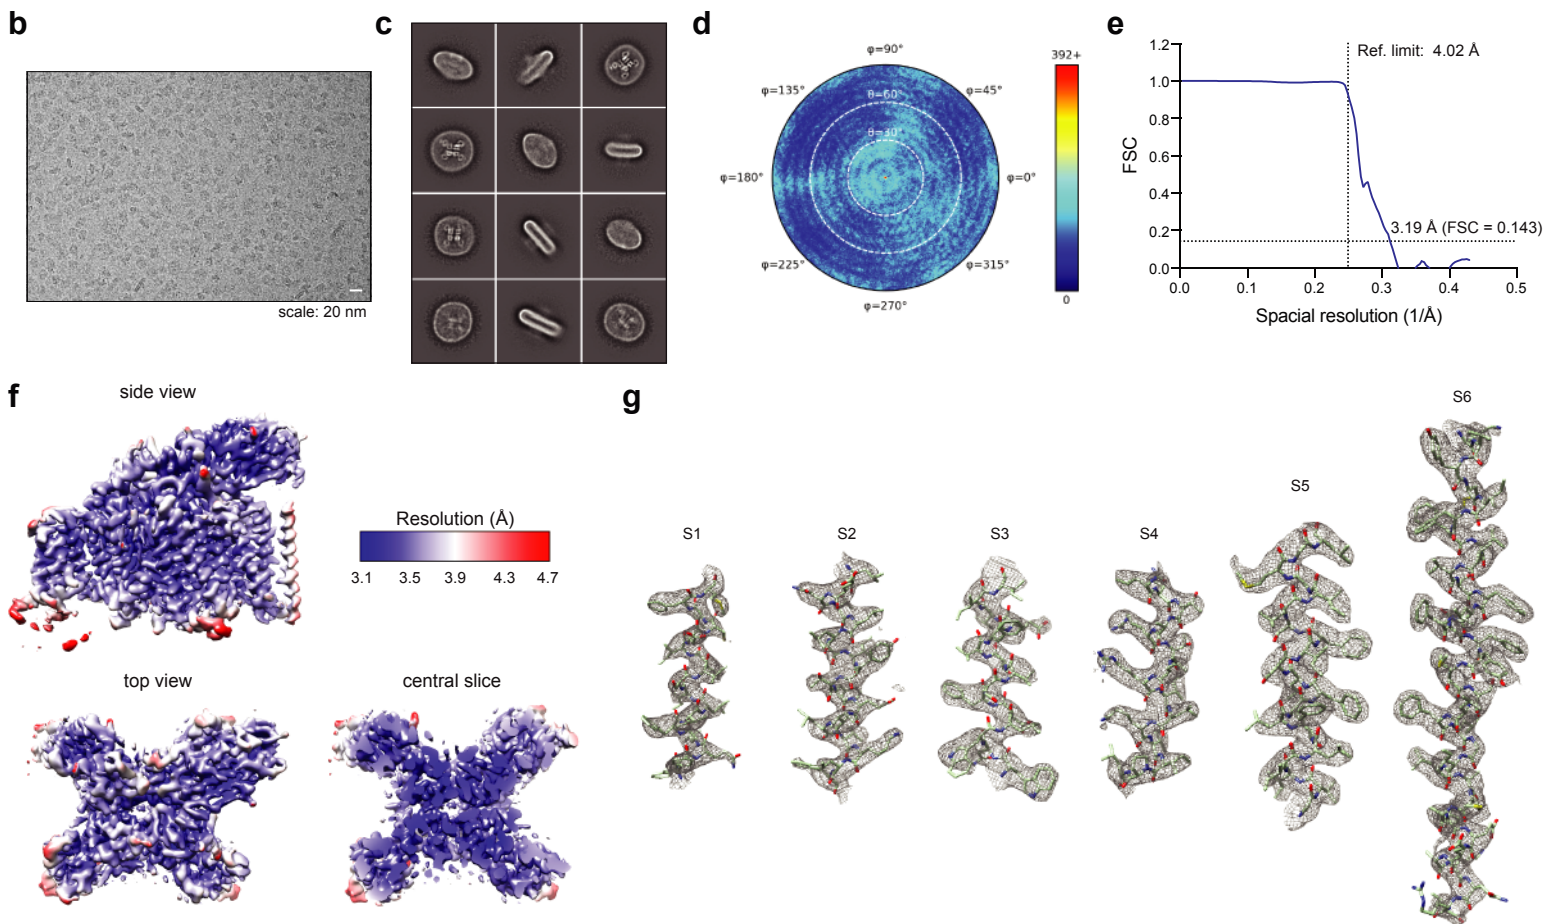

**Supplementary Figure 4. Cryo-EM workflow for Na<sub>x</sub>-nanodisc sample.**

**a.** Schematic of the cryo-EM data processing workflow for the  $\beta_3$ -Na<sub>x</sub>-nanodisc sample **b.** Representative cryo-EM micrograph of  $\beta_3$ -Na<sub>x</sub>-nanodisc sample. **c.** Representative 2D class averages. **d.** Heat map showing the overall distribution of assigned particle orientations in the final reconstruction. **e.** Global resolution estimate based off the Fourier Shell Correlation (FSC) between two half datasets. **f.** Isosurface rendering of the final 3D reconstruction colored by local resolution, as estimated by windowed FSCs. **g.** Cryo-EM map shown over transmembrane regions of DI.



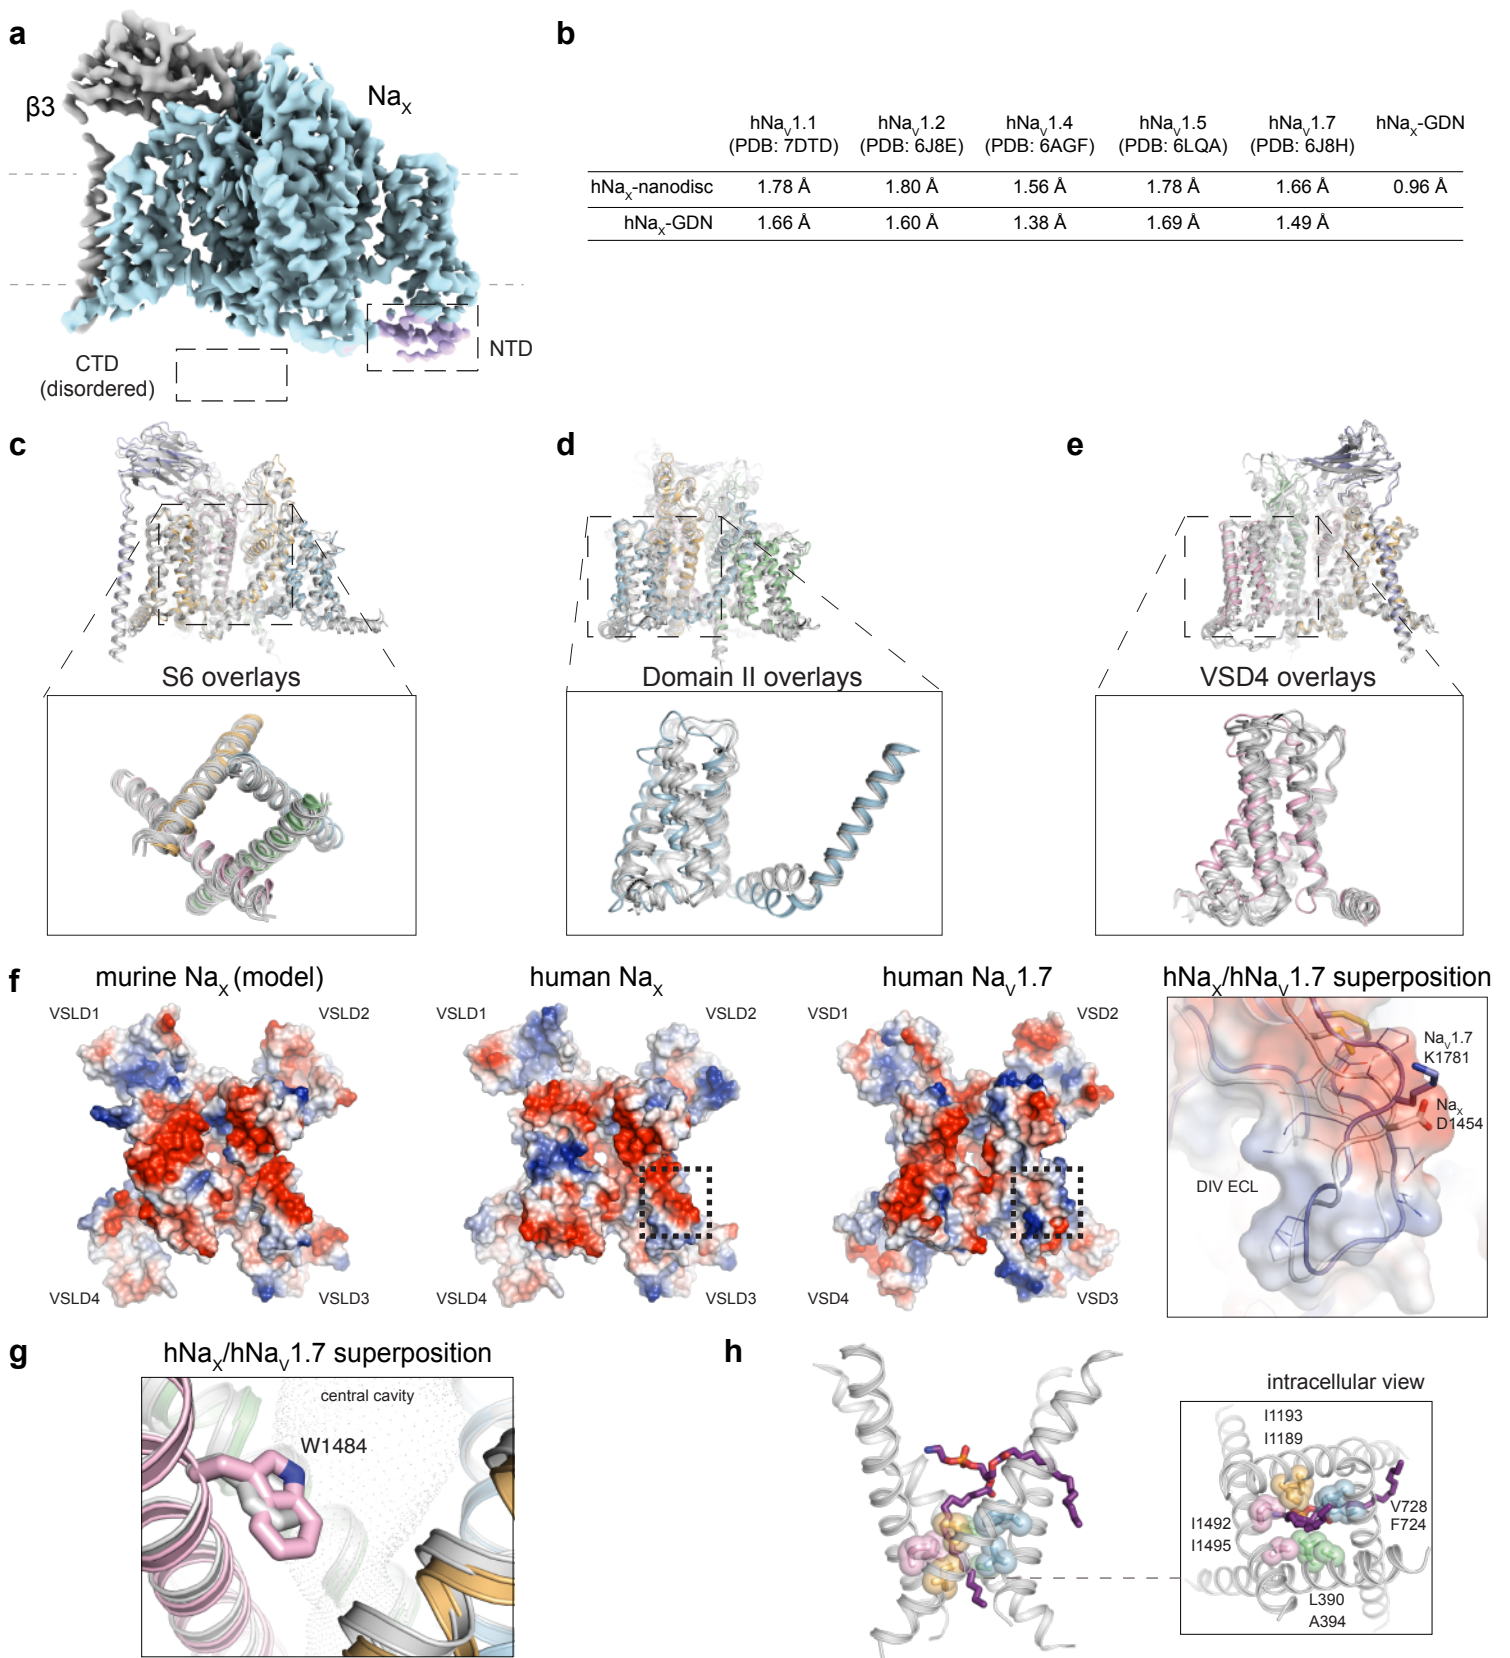

### Supplementary Figure 5. Overall Na<sub>x</sub> structure and comparison to Na<sub>v</sub> channels.

**a.** Cryo-EM reconstruction of the  $\beta_3$ -Na<sub>x</sub>-nanodisc complex. Na<sub>x</sub> is colored blue, amino-terminal domain (NTD) is purple, and the  $\beta_3$ -subunit grey. Approximate membrane boundaries are indicated. **b.** Overall root mean square deviation (RMSD) calculated between human Na<sub>x</sub> structures and indicated human Na<sub>v</sub> channel structures. **c-e.** Close-up views of  $\beta_3$ -Na<sub>x</sub>-nanodisc complex aligned with human Na<sub>v</sub>1.2 (PDB 6J8E), human Na<sub>v</sub>1.4 (PDB 6AGF), human Na<sub>v</sub>1.5 (PDB 6UZO) and human Na<sub>v</sub>1.7 (PDB 6J8J) structures from various perspectives. **f.** Extracellular view and electrostatic surface representations of, murine Na<sub>x</sub> (homology model), human Na<sub>x</sub> and human Na<sub>v</sub>1.7 (PDB 6J8J). On right, a close-up view of an electronegative DIV extracellular loop (ECL) in Na<sub>x</sub> indicates a high local sequence and structural conservation with human Na<sub>v</sub>1.7 (PDB 6J8J) except for a single residue difference (D1454 vs K1781). Additionally, no cryo-EM density for cations or identifiable cation binding sites are observed in this region. Note,  $\beta$ -subunits have been omitted for clarity. **g.** View into the central cavity highlighting the DIV W1484 side-chain of Na<sub>x</sub> with Na<sub>v</sub>1.7 (PDB 6J8J) superimposed. DIV Phe of Na<sub>v</sub>1.7 is shown in grey stick representation. **h.** Side-view of the  $\beta_3$ -Na<sub>x</sub>-nanodisc structure with S6 gate-lining side-chains and phosphatidylethanolamine shown in stick representation.

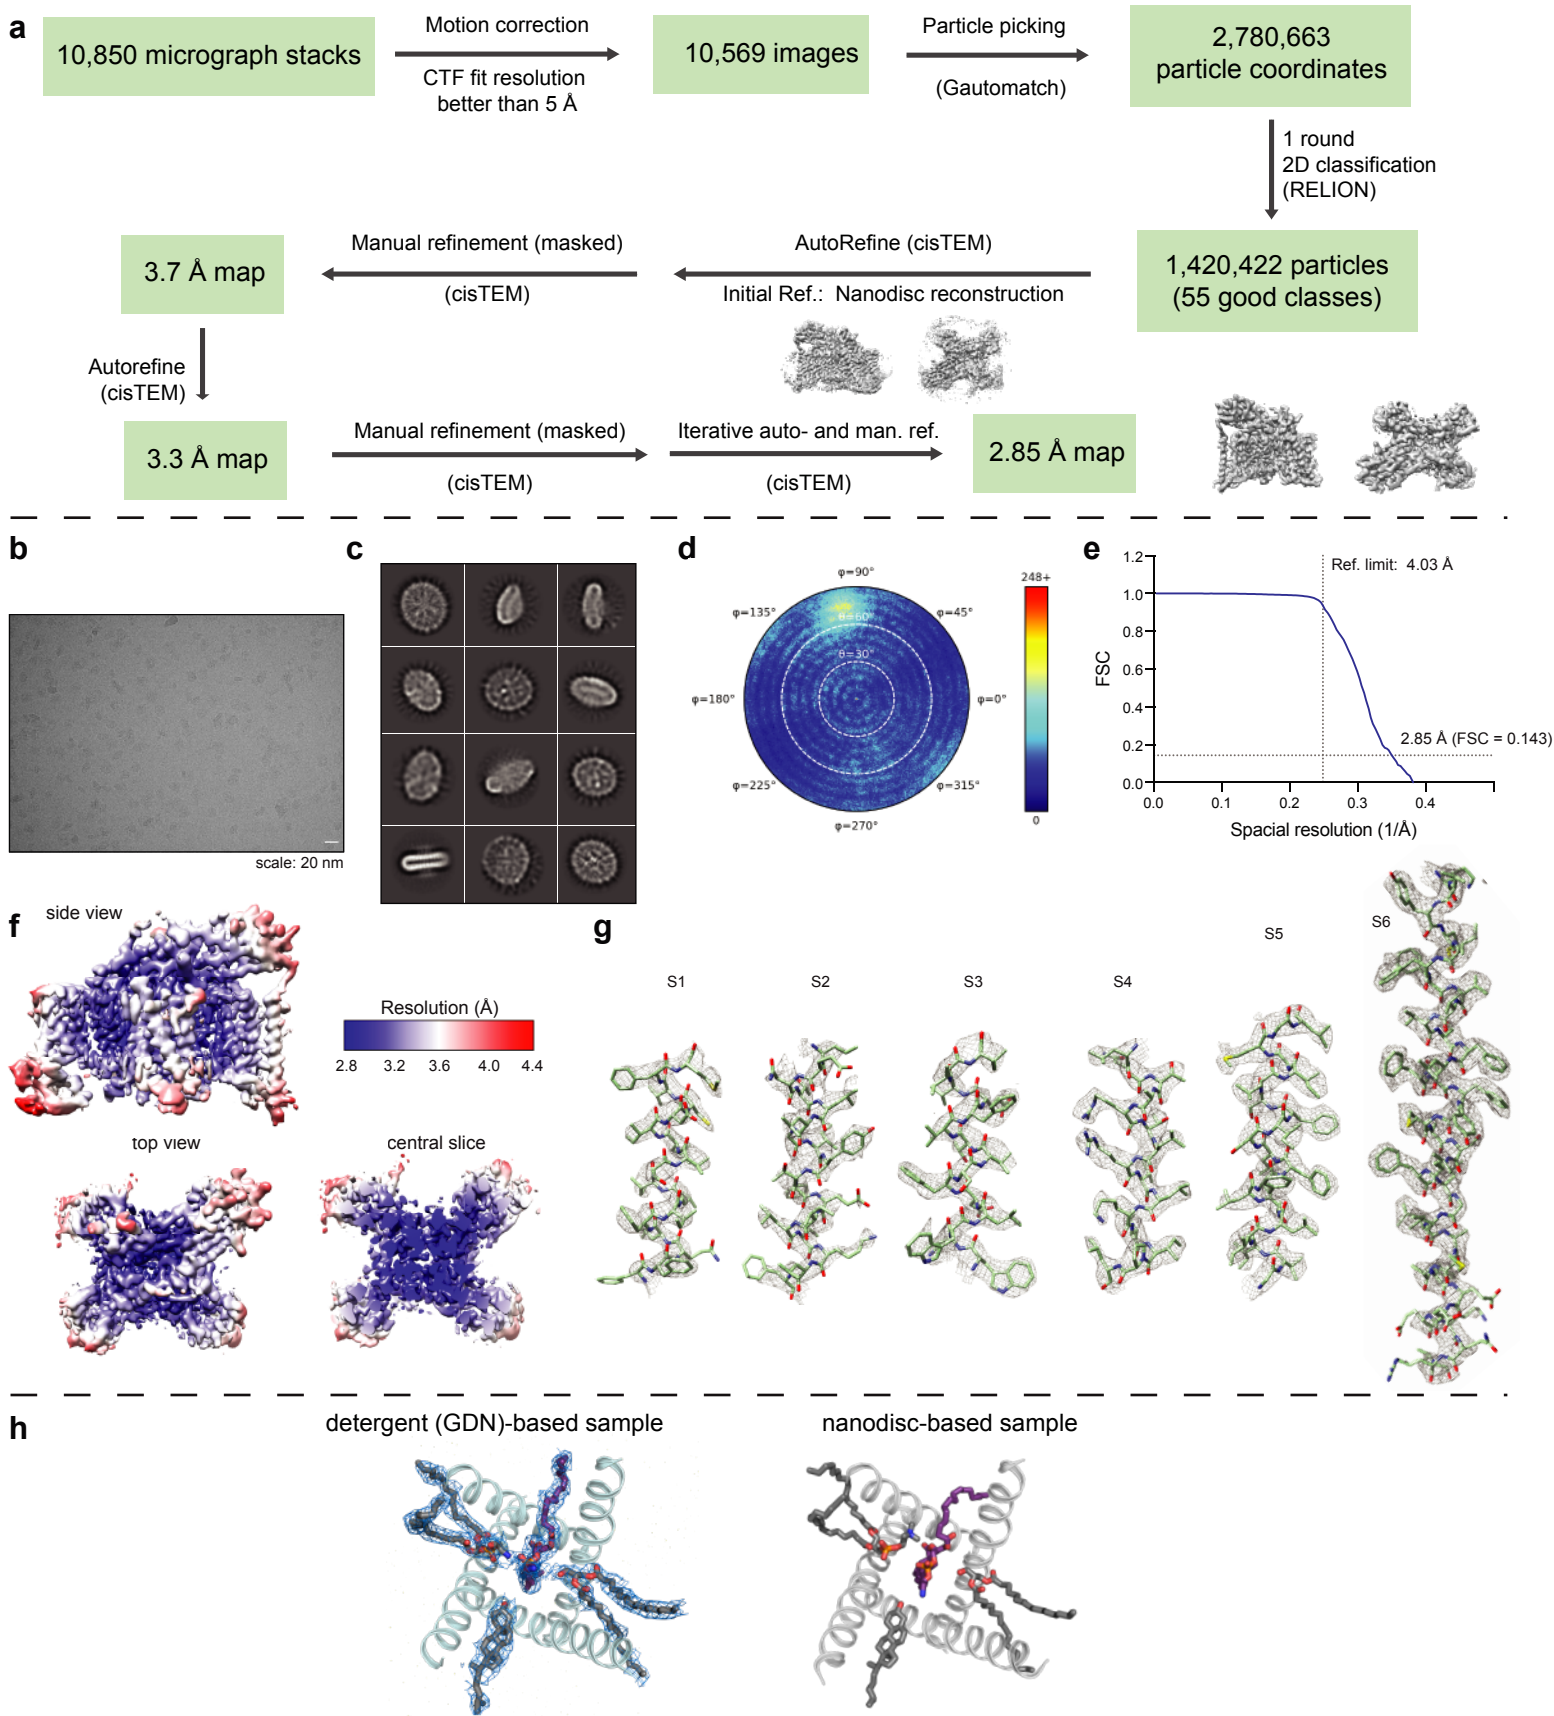

### Supplementary Figure 6. Cryo-EM workflow for $\text{Na}_x$ -GDN detergent sample.

**a.** Schematic of the cryo-EM data processing workflow for the  $\beta_3$ - $\text{Na}_x$ -detergent sample. **b.** Representative cryo-EM micrograph of  $\beta_3$ - $\text{Na}_x$ -detergent (GDN) sample. **c.** Representative 2D class averages. **d.** Heat map showing the overall distribution of assigned particle orientations in the final reconstruction. **e.** Global resolution estimate based off the Fourier Shell Correlation (FSC) between two half datasets. **f.** Isosurface rendering of the final 3D reconstruction colored by local resolution, as estimated by windowed FSCs. **g.** Cryo-EM map shown over transmembrane regions of DI. **h.** Views sliced through the pore module highlighting bound lipids with cryo-EM map for the GDN sample shown in blue mesh representation. The phosphatidylethanolamine that crosses the S6-gate is colored purple.

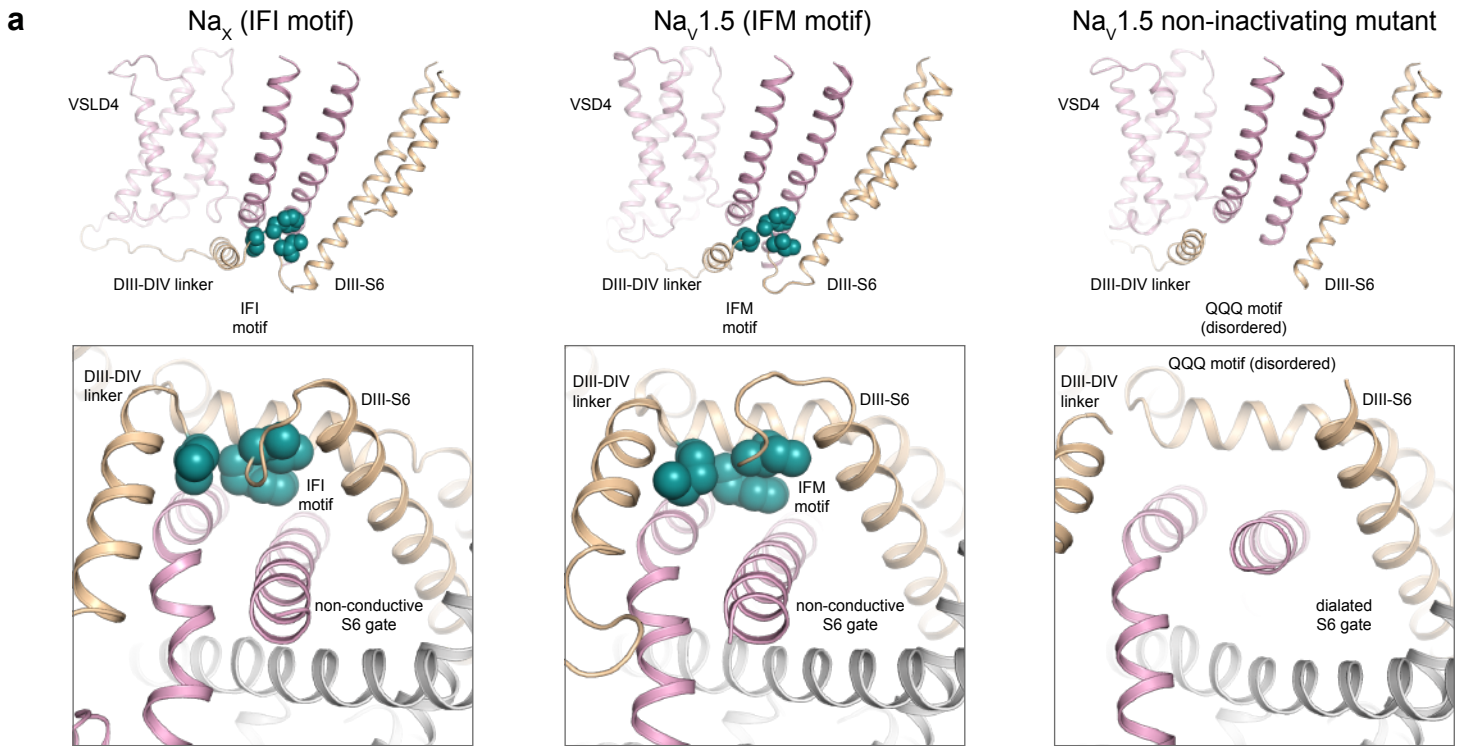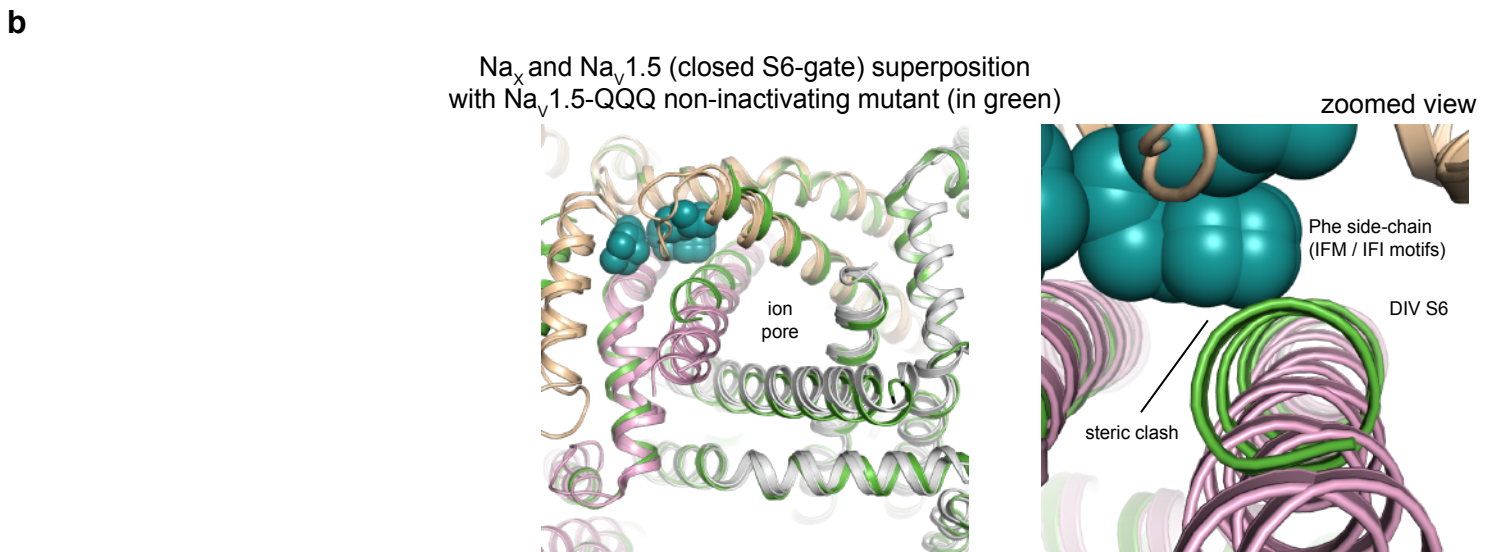

**c**

|           |      |                                                    |
|-----------|------|----------------------------------------------------|
| $Na_x$    | 1204 | GGSNIFITVKQRKQYRRLKLLMYEDSQRPVPRPLNK               |
| $Na_v1.1$ | 1494 | GGQDIFMTEEQKKYYNAMKKLGSKKPQKPIPRPGNK               |
| $Na_v1.2$ | 1484 | GGQDIFMTEEQKKYYNAMKKLGSKKPQKPIPRPANK               |
| $Na_v1.3$ | 1479 | GGQDIFMTEEQKKYYNAMKKLGSKKPQKPIPRPANK               |
| $Na_v1.4$ | 1306 | GGKDI FMTEEQKKYYNAMKKLGSKKPQKPIPRPQNK              |
| $Na_v1.5$ | 1481 | GGQDIFMTEEQKKYYNAMKKLGSKKPQKPEPRPLNK               |
| $Na_v1.6$ | 1475 | GGQDIFMTEEQKKYYNAMKKLGSKKPQKPIPRPLNK               |
| $Na_v1.7$ | 1468 | GGQDIFMTEEQKKYYNAMKKLGSKKPQKPIPRPGNK               |
| $Na_v1.8$ | 1429 | GGQDIFMTEEQKKYYNAMKKLGSKKPQKPIPRPLNK               |
| $Na_v1.9$ | 1319 | GGQDIFMTEEQKKYYNAMKKLGSKKPQKPIPRPLNK               |
|           |      | ** : * * * : * : * * * : * : * * * : * : * * * * * |

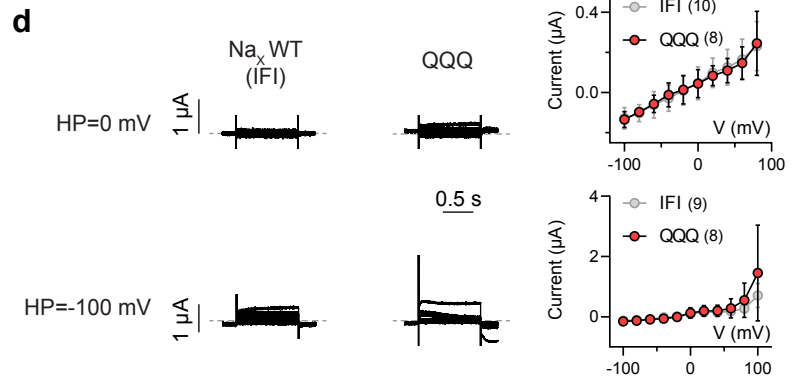

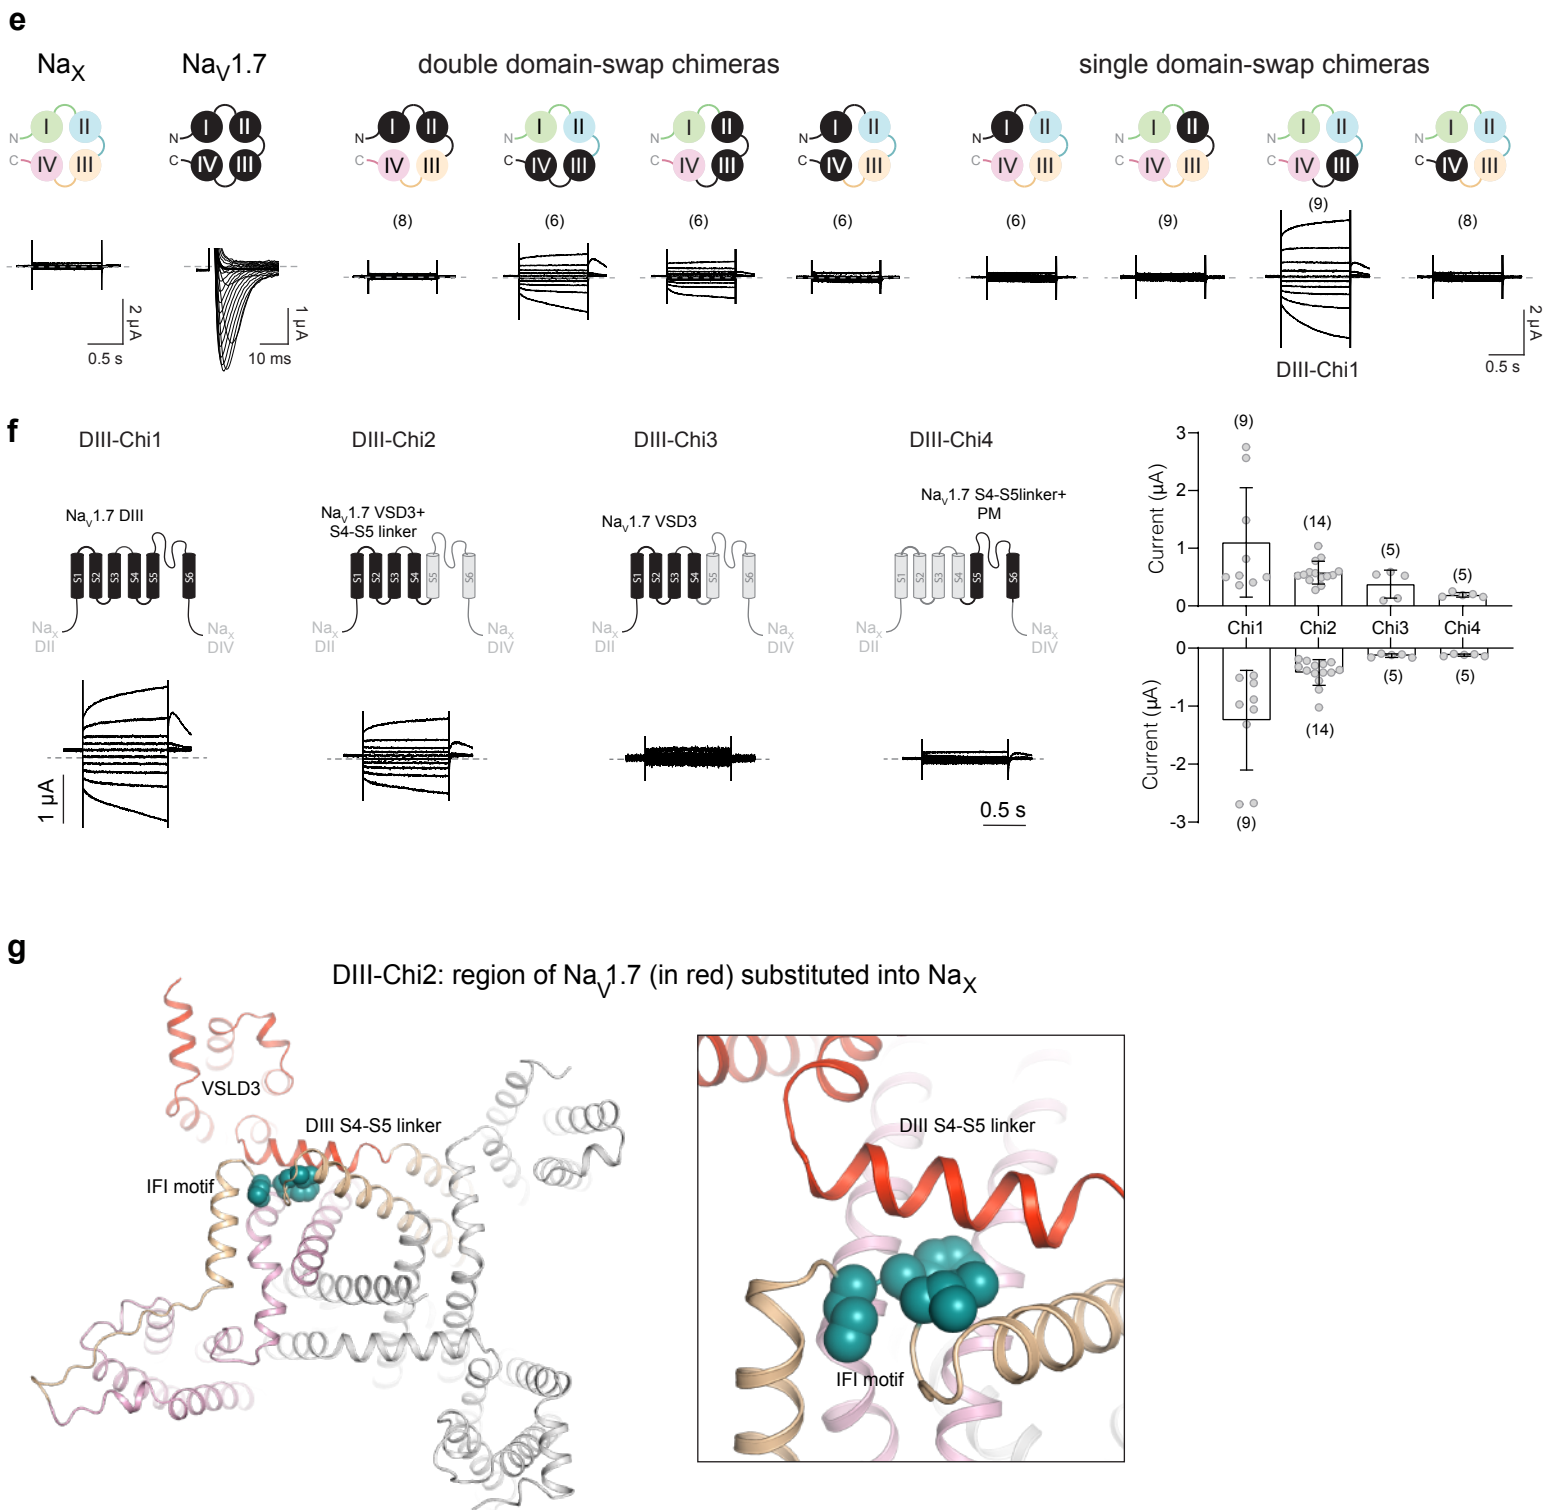

### Supplementary Figure 7. Na<sub>x</sub> DIII-DIV linker and Na<sub>v</sub>1.7-Na<sub>x</sub> chimeric channels.

**a.** Side- and intracellular views highlighting the DIII-DIV linker and IFI/IFM-motif (green spheres) of wild-type human Na<sub>x</sub>, wild-type human Na<sub>v</sub>1.5 (PDB 6LQA) and the rat Na<sub>v</sub>1.5 non-fast inactivating IFM>QQQ motif mutant (PDB 7FBS) channels. Note, in these models, the Na<sub>x</sub> pore is non-conductive (current study), wild-type Na<sub>v</sub>1.5 is presumed to represent a non-conductive, inactivated-like state<sup>26</sup>, and the IFM>QQQ motif mutant of rat Na<sub>v</sub>1.5 is proposed to be in an open and conductive state<sup>29</sup>. **b.** Superposition of wild-type human Na<sub>x</sub>, wild-type human Na<sub>v</sub>1.5 (PDB 6LQA) and the rat Na<sub>v</sub>1.5 non-fast inactivating IFM>QQQ motif mutant (PDB 7FBS) channels, with the QQQ mutant colored green. Zoomed view highlights the relative movement of the DIV S6 helix in rat Na<sub>v</sub>1.5-QQQ, and the clash this would have with the IFM/IFI-motifs as positioned in wild-type human Na<sub>v</sub>1.5 and Na<sub>x</sub>, respectively. **c.** Multi-sequence alignment of the DIII-DIV linker region of human Na<sub>x</sub> and Na<sub>v</sub> channels. The IFI/IFM-motif is indicated in green and the known (Na<sub>v</sub> channels) and NetPhos 3.1 server predicted (Na<sub>x</sub>) phosphorylation sites are indicated in red. **d.** Representative currents from oocytes expressing wild-type or IFI>QQQ-mutant human Na<sub>x</sub> with voltage steps between +80 and -100 mV, in 20 mV increments, from a HP of 0 mV, or depolarizing steps between -100 and +120 mV, in 20 mV increments, from a HP of -100 mV. I-V plots are shown on the right. Data are shown as mean ± SD. Numbers of biological replicates (*n*) are indicated. **e.** Schematics and representative currents from oocytes expressing various double-domain and single-domain swapped human Na<sub>v</sub>1.7-Na<sub>x</sub> channel chimeras in response to voltage steps between +80 and -100 mV, in 20 mV increments, from a HP of 0 mV. Numbers of biological replicates (*n*) are indicated. **f.** Schematics and representative currents from oocytes expressing focused DIII human Na<sub>v</sub>1.7-Na<sub>x</sub> channel chimeras in response to voltage steps between +80 and -100 mV, in 20 mV increments, from a HP of 0 mV. Right, maximal current amplitudes at +80 mV (top) and -100 mV (bottom) of the indicated DIII Na<sub>v</sub>1.7-Na<sub>x</sub> chimeras. Data are shown as mean ± SD. Numbers of biological replicates (*n*) are indicated. **g.** Intracellular view of Na<sub>x</sub> with regions from human Na<sub>v</sub>1.7 substituted in DIII-Chi2 highlighted in red.

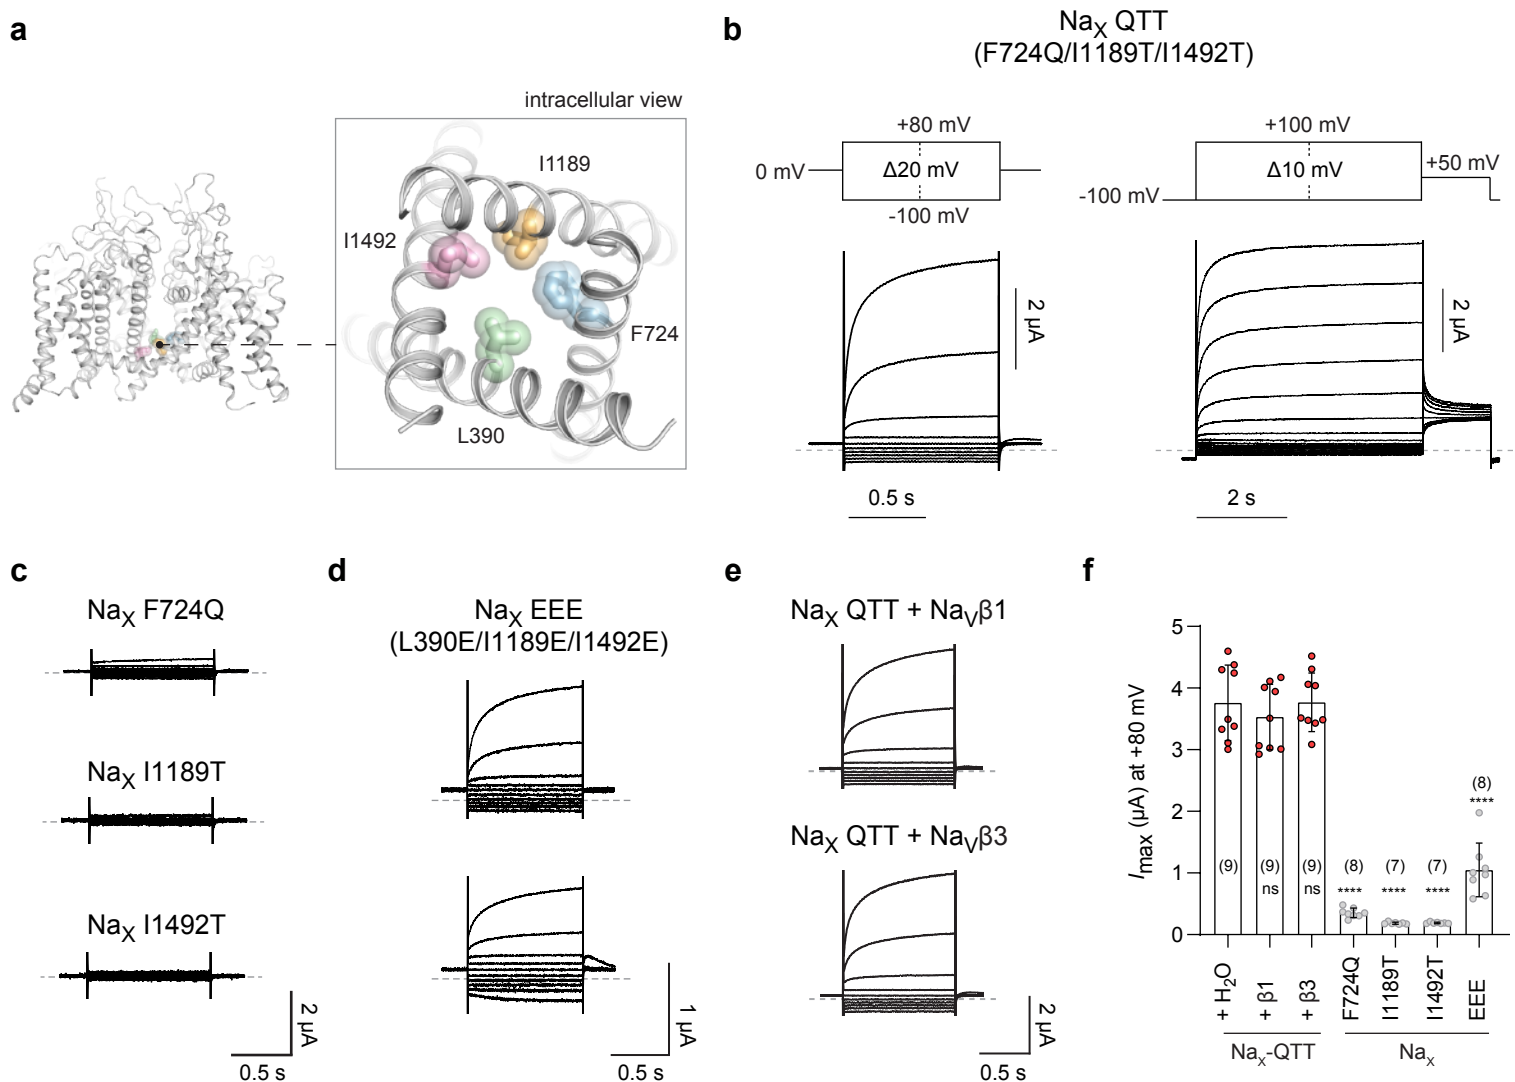

**Supplementary Figure 8. Characterization of human Na<sub>x</sub> carrying targeted pore-wetting S6-mutations (complementary and expanded Fig. 2e-g).**

**a.** Location and zoomed view of targeted hydrophobic side-chains lining the S6-gate.

**b.** Representative currents from *Xenopus laevis* oocytes expressing the Na<sub>x</sub>-QTT construct under indicated voltage protocols.

**c.** Representative currents from oocytes expressing the indicated Na<sub>x</sub> construct. Voltage protocols as above.

**d.** Representative currents from oocytes expressing the Na<sub>x</sub>-EEE construct. Voltage protocols as above.

**e.** Representative currents from oocytes expressing the Na<sub>x</sub>-QTT construct and co-expressing indicated Na<sub>v</sub> auxiliary subunit. Voltage protocols as above.

**f.** Data summary of independent experiments performed as in parts b-e. Data are shown as mean  $\pm$  SD; ns not significant; \*\*\*\* $p < 0.0001$ ; one-way ANOVA with Dunnett's test (against Na<sub>x</sub>-QTT+H<sub>2</sub>O). Exact p values and statistical parameters are provided in Source Data. Numbers of biological replicates ( $n$ ) are indicated.

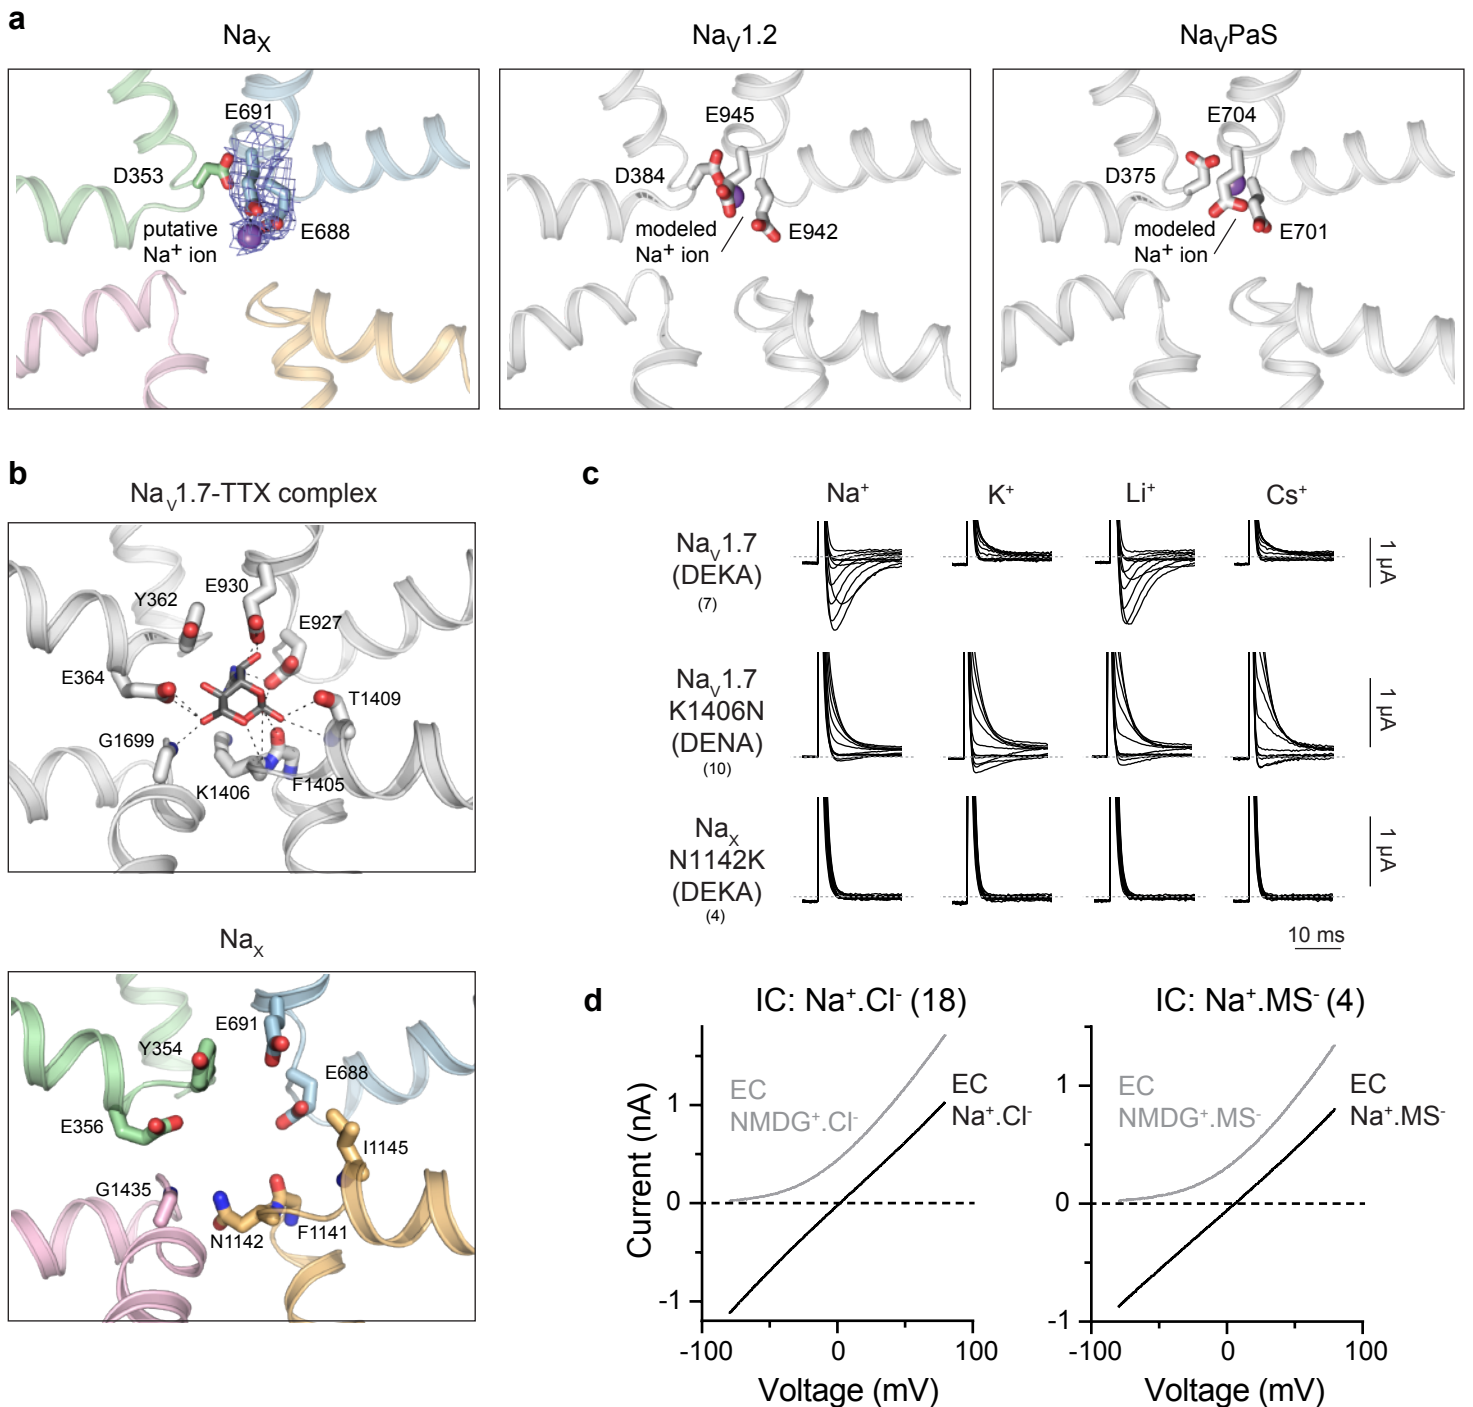

### Supplementary Figure 9. Comparison of the $\text{Na}_x$ and $\text{Na}_v1.7$ selectivity filters.

**a.** Close-up view of the  $\text{Na}_x$  selectivity filter (DEE motif shown in sticks) with a portion of the cryo-EM map (blue mesh) and a putative  $\text{Na}^+$  ion<sup>55</sup> modeled as a purple sphere. This coordination site is consistent with a  $\text{Na}^+$  ion binding site, but we cannot exclude the possibility this feature may be a water molecule or  $\text{Ca}^{2+}$  ion. The location of the assigned  $\text{Na}^+$  ion (purple sphere) in the analogous DEE motif binding site in human  $\text{Na}_v1.2$  (PDB 6J8E) and cockroach  $\text{Na}_v\text{PaS}$  (PDB 6NT4) channels are shown for comparison. **b.** Matched views of the  $\text{Na}_x$  and  $\text{Na}_v1.7$  (PDB 6J8J) selectivity filters. Tetrodotoxin is bound in  $\text{Na}_v1.7$  and key interactions are shown; where most of these interacting groups are positionally conserved in the  $\text{Na}_x$  selectivity filter. **c.** Representative currents from *Xenopus laevis* oocytes expressing wild-type or mutant human  $\text{Na}_v1.7$  and  $\text{Na}_x$  channel constructs in the presence of 115 mM extracellular  $\text{Na}^+$ ,  $\text{K}^+$ ,  $\text{Li}^+$  or  $\text{Cs}^+$ . Steps between -50 and +50 mV, in 10 mV steps, from a HP of -100 mV are shown. Numbers of biological replicates ( $n$ ) are indicated. **d.** Representative currents from HEK293 cells expressing human  $\text{Na}_x$ -QTT (containing a C-terminal GFP-Flag tag) in response to a voltage ramp from -80 to +80 mV in the presence (left) or absence (right) of chloride ( $\text{Cl}^-$ ) ions (substituted with methanesulfonate,  $\text{MS}^-$ ). Numbers of biological replicates ( $n$ ) are indicated.

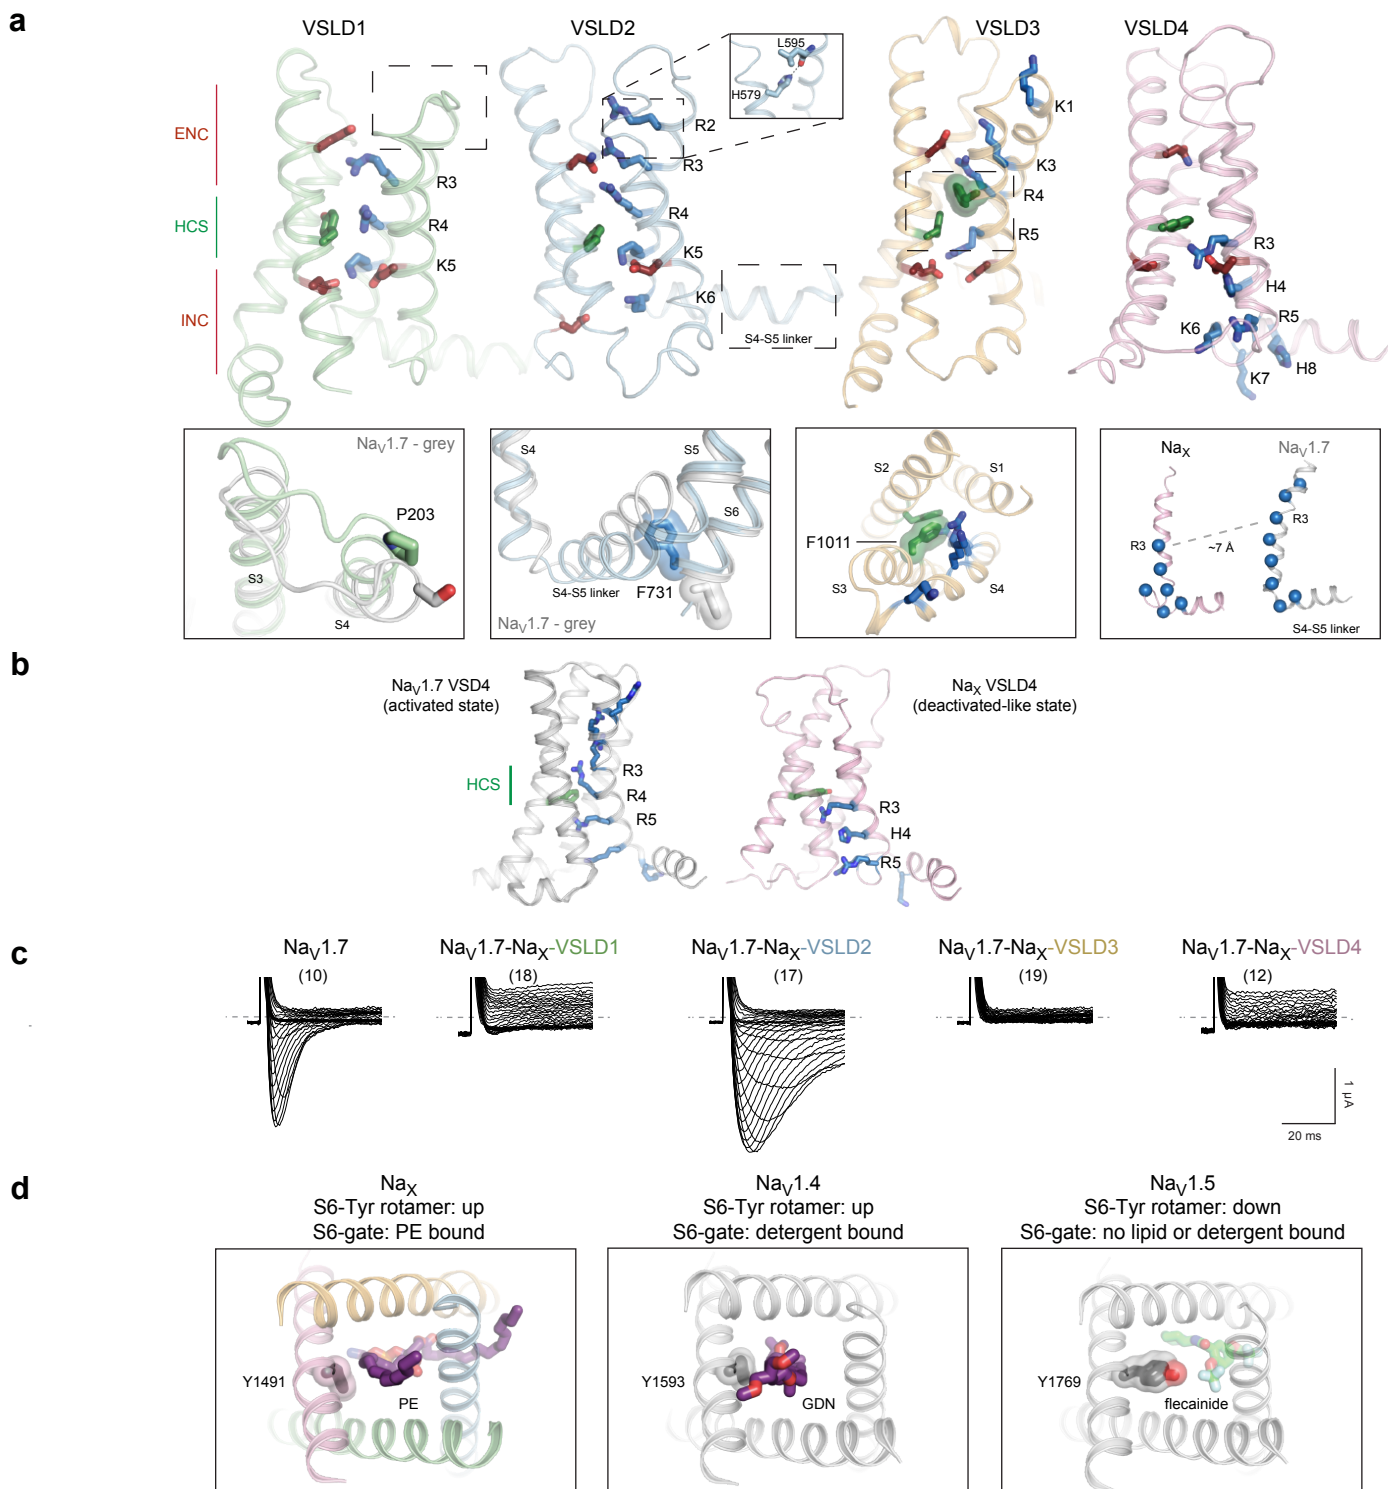

## Supplementary Figure 10. Human $\text{Na}_x$ has atypical voltage sensor-like domains but a common hydrophobic S6 gate.

**a.** VSLD1, VSLD2, VSLD3, and VSLD4 residues positionally equivalent to S4 gating charges (blue), the hydrophobic construction site (HCS, green), and the extracellular and intracellular negative charge clusters (ENC and INC, respectively, red) are shown in stick representation. VSLD1 insert highlights a unique proline in  $\text{Na}_x$ , a position conserved as serine in  $\text{Na}_v$  channels, where the Ser211Pro mutation in  $\text{Na}_v1.7$  (PDB 6J8J) is reportedly pathogenic<sup>56</sup>. VSLD2 insets highlight a unique His579-S4 interaction (top) and S4-S5 linker displacements (bottom), where an analogous DII S6 sequence in  $\text{Na}_v1.7$  (i.e.  $\Delta\text{Leu966}$ , see Supplementary Fig. 2) is reportedly pathogenic<sup>57</sup>. VSLD3 inset highlights a unique phenylalanine (Phe1011, green surface) from the S3 helix which is conserved as a serine in  $\text{Na}_v$  and KCNQ1 channels, where the analogous S3 mutation (Ser209Phe) mutation in KCNQ1 is reportedly pathogenic<sup>58</sup>. VSLD4 inset shows a comparison of the  $\text{C}\alpha$  of gating charge residues (blue spheres) relative to  $\text{Na}_v1.7$  VSD4 (PDB 6J8J). **b.** View of human  $\text{Na}_v1.7$  VSD4 and  $\text{Na}_x$  VSLD4 highlighting the HCS (green) and positions equivalent to the S4 gating charges (blue). **c.** Representative currents from *Xenopus laevis* oocytes expressing  $\text{Na}_v1.7$  and various  $\text{Na}_v1.7$ - $\text{Na}_x$ -VSLD channel chimeras in response to depolarizing steps between -80 and +65 mV in 5 mV increments from a HP of -100 mV. Numbers of biological replicates ( $n$ ) are indicated. **d.** Intracellular view of the  $\text{Na}_x$  S6-gate with Tyr1491 (S6) and bound phosphatidylethanolamine shown and compared to  $\text{Na}_v1.4$  (assumed to be in a non-conductive, fast-inactivated state; PDB 6AGF) and drug-bound  $\text{Na}_v1.5$  (assumed to be in a non-conductive, drug blocked inactivated state; PDB 6UZ0). Assigned lipid, detergent and drug molecules are shown in purple (PE and GDN) and green (flecainide) stick representations, respectively.

**Supplementary Table 1. Cryo-EM data collection, refinement and validation statistics**

|                                                     | $\beta$ 3-Nax-nanodisc<br>(EMDB-25919)<br>(PDB 7TJ8) | $\beta$ 3-Nax-GDN<br>(EMDB-25920)<br>(PDB 7TJ9) |
|-----------------------------------------------------|------------------------------------------------------|-------------------------------------------------|
| <b>Data collection and processing</b>               |                                                      |                                                 |
| Magnification                                       | 165,000                                              | 105,000                                         |
| Voltage (kV)                                        | 300                                                  | 300                                             |
| Electron exposure (e <sup>-</sup> /Å <sup>2</sup> ) | 48.579                                               | 64.009                                          |
| Defocus range (μm)                                  | 0.5-1.5                                              | 0.5-1.5                                         |
| Pixel size (Å)                                      | 0.849                                                | 1.1648                                          |
| Symmetry imposed                                    | C1                                                   | C1                                              |
| Initial particle images (no.)                       | 1,968,741                                            | 2,780,663                                       |
| Final particle images (no.)                         | 1,238,338                                            | 1,420,422                                       |
| Map resolution (Å)                                  | 3.2                                                  | 2.9                                             |
| FSC threshold                                       | 0.143                                                | 0.143                                           |
| Map resolution range (Å)                            | 3.2 – 46.6                                           | 2.9 – 33.13                                     |
| <b>Refinement</b>                                   |                                                      |                                                 |
| Initial model used (PDB code)                       | 6AGF                                                 | $\beta$ 3-Nax-nanodisc                          |
| Model resolution (Å)                                | 3.4                                                  | 3.1                                             |
| FSC threshold                                       | 0.5                                                  | 0.5                                             |
| Model resolution range (Å)                          | 3.2 – 46.6                                           | 2.9 – 33.13                                     |
| Map sharpening <i>B</i> factor (Å <sup>2</sup> )    | -90                                                  | -90                                             |
| Model composition                                   |                                                      |                                                 |
| Non-hydrogen atoms                                  | 21502                                                | 22342                                           |
| Protein residues                                    | 1242                                                 | 1273                                            |
| Ligands                                             | 18                                                   | 23                                              |
| <i>B</i> factors (Å <sup>2</sup> )                  |                                                      |                                                 |
| Protein                                             | 67.58                                                | 77.83                                           |
| Ligand                                              | 64.16                                                | 70.41                                           |
| R.m.s. deviations                                   |                                                      |                                                 |
| Bond lengths (Å)                                    | 0.004                                                | 0.006                                           |
| Bond angles (°)                                     | 0.906                                                | 0.611                                           |
| Validation                                          |                                                      |                                                 |
| MolProbity score                                    | 1.78                                                 | 1.66                                            |
| Clashscore                                          | 5.79                                                 | 5.15                                            |
| Poor rotamers (%)                                   | 0.80                                                 | 0.09                                            |
| Ramachandran plot                                   |                                                      |                                                 |
| Favored (%)                                         | 93.72                                                | 94.85                                           |
| Allowed (%)                                         | 5.79                                                 | 5.15                                            |
| Disallowed (%)                                      | 0.49                                                 | 0.00                                            |
